## **MYO19 interacts weakly with Miro2 GTPases on the mitochondrial outer membrane**

Jennifer L. Bocanegra<sup>1</sup>, Barbara M. Fujita<sup>1</sup>, Natalie R. Melton<sup>1</sup>, J. Matthew Cowan<sup>1</sup>, Elizabeth L. Schinski<sup>1</sup>,  
Tigist Y. Tamir<sup>2</sup>, M. Ben Major<sup>2,3,4</sup>, and Omar A. Quintero<sup>1</sup>

<sup>1</sup>Department of Biology, University of Richmond, VA 23173

<sup>2</sup>Department of Pharmacology, University of North Carolina Chapel Hill, NC 27599

<sup>3</sup>Department of Cell Biology and Physiology, University of North Carolina Chapel Hill, NC 27599

<sup>4</sup>Lineberger Comprehensive Cancer Center, University of North Carolina Chapel Hill, NC 27599

Running Title: MYO19 interacts with Miro2

Corresponding author:

Omar A. Quintero

Department of Biology

University of Richmond

138 UR Drive

Richmond, VA 23173

Office: (804)287-6892

Lab: (804) 289-1706

FAX (804) 289-8233

Email: [oquinter@richmond.edu](mailto:oquinter@richmond.edu)

## **Acknowledgements and author contributions**

OAQ was supported by a grant from the National Institute of General Medical Sciences at the NIH (R15 GM119077) and by funding from the University of Richmond School of Arts & Sciences. JLB and JMC were supported by the NIGMS grant to OAQ. BMF was supported by the Robert F. Smart Award from the Biology Department, and funding from the School of Arts & Sciences at the University of Richmond. NRM and ELS were supported by funding from the University of Richmond School of Arts and Sciences. TYT was supported by an HHMI Gilliam Fellowship for Advanced Study. We would like to thank Uri Manor, Anna Hatch, Jenci Hawthorne, Rebecca Adikes, Sarah Rice, Susan Walsh, and Andrew Moore for critical reading and discussions related to this manuscript. Hypotheses and experiments in this study were conceived by OAQ. Experiments were performed by JLB, BMF, NRM, JMC, ELS, TYT, and OAQ. Data analysis and manuscript preparation were completed by JLB, BMF, NRM, JMC, TYT, MBM, and OAQ. Except for the proteomics analysis, all experiments for the initial submission were completed during the 10-week 2018 summer research session at University of Richmond. We would also like to thank Edward Salmon for his example and inspiration.

## Abstract

MYO19 interacts with mitochondria through a unique C-terminal mitochondrial association domain (MyMOMA). The specific molecular mechanisms for localization of MYO19 to mitochondria are poorly understood. Using promiscuous biotinylation, we have identified ~100 candidate MYO19 interacting proteins, a subset of which were also identified in via affinity-capture experiments. We chose to further explore the interaction between MYO19 and the mitochondrial GTPase Miro2 by expressing mchr-Miro2 in combination with GFP-tagged fragments of the MyMOMA domain and assaying for recruitment of MYO19-GFP to mitochondria. Co-expression of MYO19<sup>898-970</sup>-GFP with mchr-Miro2 enhanced MYO19<sup>898-970</sup>-GFP localization to mitochondria. Mislocalizing Miro2 to filopodial tips or the cytosolic face of the nuclear envelope did not recruit MYO19<sup>898-970</sup>-GFP to either location. To address the kinetics of the Miro2/MYO19 interaction, we used FRAP analysis and permeabilization-activated reduction in fluorescence (PARF) analysis. MyMOMA constructs containing a putative membrane insertion motif but lacking the complete Miro2 interacting region, MYO19<sup>853-935</sup>-GFP, displayed slow exchange kinetics. MYO19<sup>898-970</sup>-GFP, which does not include the membrane-insertion motif, displayed rapid exchange kinetics, suggesting that the MYO19 and Miro2 interaction is weaker than between MYO19 and the mitochondrial outer membrane. Mutation of well-conserved, charged residues within MYO19 or within the switch I and II regions of Miro2 abolished the enhancement of MYO19<sup>898-970</sup>-GFP localization in cells ectopically expressing mchr-Miro2. Additionally, expressing mutant versions of Miro2 thought to represent particular nucleotide states indicated that the enhancement of MYO19<sup>898-970</sup>-GFP localization is dependent on Miro2 nucleotide state. Taken together, these data suggest a role for Miro2 in regulation and integration of actin- and microtubule-based mitochondrial activities.

Key words/phrases: mitochondria, myosin, Miro, outer membrane, GTPase

## Introduction

The mitochondrial network serves multiple roles central to cellular physiology in addition to ATP homeostasis. Mitochondria are also important reservoirs for buffering intracellular calcium, regulation of reactive oxygen species, lipid synthesis, and apoptosis. [Friedman and Nunnari 2014]. Depending on the cell type and cell state, the geometry of the mitochondrial network can vary from a reticular arrangement of long threads, to a large number of smaller vesicular structures [Collins et al. 2002; Collins and Bootman 2003; Griparic and van der Blik 2001]. The arrangement of the network is regulated by a balance of fission and fusion events [Mitra 2013], and the location of mitochondrial components within cells involves active positioning of these organelles in response to local need.

Mitochondrial interactions with the cytoskeleton play key roles in many of the processes related to mitochondrial dynamics and positioning. Loss of specific intermediate filament functions through either knockdown, knock out, or mutation results in changes to mitochondrial motility, changes in mitochondrial distribution, or changes in metabolic activity in a number of different cell types [Chernoivanenko et al. 2015; Nekrasova et al. 2011; Schwarz and Leube 2016]. Much of our understanding of motor-protein-based transport comes from the study of mitochondrial motility in neurons, where long-range transport is thought to be mediated by interactions of mitochondria with microtubule based motors [Saxton and Hollenbeck 2012; Schwarz 2013]. Minus-end directed motility is thought to be dynein-mediated, while plus-end mediated motility is facilitated by kinesin-family proteins. Additionally, other proteins, such as syntaphilin, serve as microtubule-based mitochondrial anchors [Chen and Sheng 2013; Kang et al. 2008]. There is a growing body of evidence indicating that microtubules and their associated proteins also influence fission and fusion dynamics. Studies in *S. pombe* demonstrate that interactions with microtubules inhibit mitochondrial fission [Mehta et al. 2019], while studies in HeLa cells provide evidence that mitochondria/microtubule interactions promote fission events [Perdiz et al. 2017].

Actin filaments and their associated proteins also contribute to the fission/fusion balance in cells, as well as providing an additional system for motor-based transport through actin-myosin interactions. Myosin motors have been associated with mitochondrial transport; loss of function of a variety of myosin genes leads to alterations in mitochondrial localization and distribution [Kruppa et al. 2018; Pathak et al. 2010; Rohn et al. 2014]. Actin assembly mediated by ER-bound INF2 [Korobova et al. 2013] and mitochondria-bound Spire1C [Manor et al. 2015] contribute to Drp1-mediated mitochondrial fission [Hatch et al. 2016; Ji et al. 2015], and a number of different studies suggest that class II myosins are involved in this process [DuBoff et al. 2012; Korobova et al. 2014]. It has recently been shown that

Arp2/3-mediated actin filament clouds transiently assemble onto a large fraction (~1/4) of the cellular mitochondria, promoting fission followed by fusion events once the cloud dissipates [Moore et al. 2016]. These clouds have been observed to cycle throughout the cytoplasm in a number of different cell types, interacting with the entirety of the mitochondrial network in approximately 15 minutes. Actin-cloud activity is hypothesized to promote mixing of mitochondrial contents and prevention of large, inappropriately hyperfused mitochondrial arrangements.

Normal cellular activity requires proper coordination of complex interconnected cellular functions, such as cytoskeleton-mediated mitochondrial activities. A growing body of evidence suggests that the small GTPases Miro1 and Miro2 may be central signaling hubs, influencing multiple cytoskeletal systems and coordinating mitochondrial functions. Miro1 and Miro2 are inserted into the mitochondrial outer membrane (MOM) through a C-terminal  $\alpha$ -helix [Fransson et al. 2003]. The N-terminal 600 amino acids (approximately) face the cytoplasm, and consist of an N-terminal GTPase domain, two calcium binding EF hand motifs, and a second C-terminal GTPase domain [Fransson et al. 2003; Guo et al. 2005; Klosowiak et al. 2013]. Miro proteins have been shown to interact with microtubule-based motors through the adaptors, Trak1 and Trak2 [Glater et al. 2006; MacAskill et al. 2009a]. Some reports indicate that Miro/Trak activities are dependent on calcium concentration [Macaskill et al. 2009b; Saotome et al. 2008; Wang and Schwarz 2009] and/or on the nucleotide state of the Miro GTPase domains [MacAskill et al. 2009a]. Miro proteins also interact with the fission and fusion machinery [Misko et al. 2010], suggesting a potential mechanism for coordinating microtubule-based motility with the local state of the mitochondrial network. Recent reports have also implicated Miro in actin-based mitochondrial functions. Mouse embryonic fibroblasts (MEF) Miro2 knockouts show decreased levels of the unconventional myosin, MYO19; MEFs with Miro1 and Miro2 knocked out show even lower levels of MYO19 [Lopez-Domenech et al. 2018]. HeLa cells with Miro1 and Miro2 knockdown showed a similar, low MYO19 phenotype [Oeding et al. 2018]. Additionally, the most C-terminal region of the MYO19 tail was shown to interact with the N-terminal GTPase domain of Miro1 [Oeding et al. 2018].

MYO19 is a mitochondria-associated unconventional myosin [Quintero et al. 2009]. Although evolutionarily conserved in unicellular holozoan lineages [Sebe-Pedros et al. 2014], class XIX myosins have been lost from lineages leading to flies and worms [Odrionitz and Kollmar 2007]. The N-terminal motor domain contains a high duty ratio [Lu et al. 2014], actin-activated ATPase capable of generating plus-end directed movements on actin filaments, *in vitro* [Adikes et al. 2013]. The lever arm region contains three IQ motifs capable of binding calmodulin [Adikes et al. 2013] as well as other myosin light chains [Lu et al. 2014]. The mitochondria-binding, C-terminal MyMOMA domain contains a putative,

monotopically inserted  $\alpha$ -helix [Hawthorne et al. 2016; Shneyer et al. 2016], and the membrane-specificity of binding can be shifted to the endoplasmic reticulum by mutating two well-conserved basic residues located in close proximity to the monotopic insertion [Hawthorne et al. 2016; Shneyer et al. 2016]. In some cell types, low-level ectopic expression of full-length MYO19 leads to a gain-of-function phenotype where the vast majority of the cellular mitochondrial network is motile [Quintero et al. 2009]. In other cell types, ectopically expressed, fluorescently tagged MYO19 has also been shown to localize with mitochondria at the tips of starvation-induced filopodia [Shneyer et al. 2017]. Loss of MYO19 function leads to a decreased ability to generate starvation-induced filopodia [Shneyer et al. 2016]. MYO19 knockdown also leads to two distinct defects tied to cell division [Rohn et al. 2014]: an increased failure rate at cytokinesis, and (for cells that proceed through cytokinesis) an unequal distribution of mitochondria in the resulting daughter cells.

Although Miro1 and Miro2 proteins contain approximately 60% sequence homology [Fransson et al. 2003], differences exist in the cellular functions of the two paralogs and in their abilities to interact with other protein partners [Fransson et al. 2006; Lopez-Domenech et al. 2018; Lopez-Domenech et al. 2016; MacAskill et al. 2009a]. We hypothesized that the ability of MYO19 to interact with Miro1 would differ from MYO19 interactions with Miro2, and chose to investigate MYO19/Miro2 interactions using cell based, quantitative imaging approaches. Here we demonstrate that the Miro2/MYO19 interaction is potentially dependent on the nucleotide state of the N-terminal GTPase domain, and that the kinetics of the Miro2/MYO19 interaction are faster exchanging than those of the MYO19 membrane-inserted  $\alpha$ -helix/MOM interaction. We propose a mechanism by which MYO19/Miro2 interactions would facilitate membrane-insertion of the monotopic  $\alpha$ -helix, providing a means of regulating the levels of MYO19 on the mitochondrial outer membrane through Miro-mediated signaling pathways.

## Results and Discussion

### *Interaction-analyses reveal potential MYO19 binding partners*

MYO19 interacts with the mitochondrial outer membrane through the MyMOMA domain [Quintero et al. 2009], a sequence of ~150 amino acids containing many basic residues [Hawthorne et al. 2016] and a putative monotopic membrane insertion [Shneyer et al. 2016]. The MyMOMA domain lacks sequence homology with other known proteins, making prediction of interacting partners challenging. In order to identify potential MYO19 binding partners, we generated a plasmid containing the promiscuous biotin ligase, BioID2 [Kim et al. 2016], attached to the C-terminus of the MyMOMA domain (amino acids 824-970) of human MYO19. We included a 30 amino acid linker sequence between BioID2 and MyMOMA to minimize any steric hindrance that might impact the ability of BioID2 to biotinylate neighboring proteins [Kim et al. 2016]. MYO19<sup>824-970</sup>-BioID2 localizes to mitochondria in HeLa cells stably expressing the construct, and when incubated with biotin, ALEXA350 streptavidin staining of mitochondria increased, compared to the parent HeLa cells not expressing MYO19<sup>824-970</sup>-BioID2 (Figure 1A). Western blots also indicate enhanced biotinylation in MYO19<sup>824-970</sup>-BioID2 expressing cells (Figure 1B), though to a lower level than in comparison with other cell lines and constructs under similar conditions [Kim et al. 2016; Roux et al. 2012]. Upon establishing proper localization of the MYO19<sup>824-970</sup>-BioID2 construct and increased biotinylation in HeLa cells, we mass spectrometry-based proteomics to evaluate biotinylated proteins from BioID2-MYO19<sup>824-970</sup> expressing cells, compared to parental HeLa cells in biological triplicate.

Multiple approaches can be taken to analyze the results of potential interactors identified by promiscuous biotinylation. MaxQuant analysis [Cox and Mann 2008] identified 1500 biotinylated proteins, 3 being low confidence hits, and 32 being high-confidence hits based on label-free-intensity quantitation as well as peptide count (Supplemental Table 2). We also used the Significance Analysis of Interactome (SAINT) method to identify potential MYO19 interactors [Choi et al. 2011]. This scoring system not only accounts for whether a protein is present in the BioID2 sample, but whether it is significantly more enriched in the experimental versus the control sample. SAINT analysis of whole-cell lysates identified 665 proteins identified in the BioID2-MyMOMA cells that were not identified in the control HeLa cells not expressing any BioID2 construct. Fifty-seven of those proteins had a SAINT basal false discovery rate (BFDR) score less than 10% (Supplemental Table 2).

To determine which proteins within these two lists of candidate interactors may also bind to MYO19, we cross-referenced our biotinylation data with published protein-protein interaction data available at THEBIOGRID.org, an online repository of peer-reviewed, published, protein-protein

interaction data [Stark et al. 2006]. In the case of MYO19, three studies using affinity-capture in combination with mass spectrometry have identified a total of 198 MYO19 interactors across multiple studies [Boldt et al. 2016; Choudhury et al. 2017; Giurato et al. 2018; Hein et al. 2015; Huttlin et al. 2017; Huttlin et al. 2015; Khanna et al. 2018] (Supplemental Table 2). Of the 1500 MaxQuant targets, 59 were also identified in the BIOGRID data. Limiting the MaxQuant list to the high-confidence (32) and low-confidence (3) hits resulted in an overlap of 6 targets with BIOGRID data: palladin (PALLD), mitofilin (IMMT), filamin A (FLNA), filamin B (FLNB), voltage-dependent anion-selective channel protein 2 (VDAC2), and neuroblast differentiation-associated protein (AHNAK). Of the 57 proteins with a SAINT BFDR < 0.1, five proteins overlapped with BIOGRID (Figure 1C): MYO19 itself (BFDR < 0.0001), mitofilin (BFDR < 0.0001), palladin (BFDR < 0.0001), cortactin (CTTN, BFDR < 0.0001), and Miro2 (RHOT2, BFDR < 0.0892). Comparing the two sets, cortactin and Miro2 were identified in the MaxQuant data, but not identified as high- or low-confidence hits. Filamin A, filamin B, VDAC2, and AHNAK were not present in the SAINT list of 665 proteins not observed in the control samples. Oeding and colleagues identified 41 proteins interacting biotinylated by BioID-MYO19<sup>824-970</sup> [Oeding et al. 2018]. Of those proteins, 10 overlap with our SAINT list, four with a BFDR < 0.1, including Miro2 (Supplemental Table 2). Although both sets of data result from stable expression in HeLa cells of a MyMOMA domain construct, the Oeding construct was N-terminally tagged with a different promiscuous biotin ligase [Roux et al. 2012] and a short, two amino-acid linker. Our construct contained a smaller, more enzymatically active biotin ligase [Kim et al. 2016] with a longer linker attached to the C-terminus of MYO19<sup>824-970</sup>. As different termini of the MyMOMA domain might be positioned differently their cellular environment, tagging different ends of the MyMOMA domain could result in the identification of distinct sets of neighboring proteins.

Based on these analyses, multiple proteins with functional links to the cytoskeleton and mitochondrial function have been identified. Mitofilin localizes to the inner membrane space [Odgren et al. 1996] and is associated with maintenance of cristae morphology [John et al. 2005; Zerbes et al. 2012]. The *Drosophila* homolog, MIC60, has been shown to regulate mitochondrial dynamics. Mutant flies lacking MIC60 show decreased Miro protein levels and altered mitochondrial dynamics [Tsai et al. 2017]. VDAC2 are mitochondrial outer membrane porins involved in ATP homeostasis [Colombini 2012; Saks et al. 1995], and in some instances may be regulated by interaction with microtubules [Ramos et al. 2019]. AHNAK is a large scaffolding protein with the ability to bind actin and other cellular components in a variety of cellular contexts [Davis et al. 2014], including muscle contraction [Haase et al. 2004], cancer [Shankar et al. 2010], and Schwann cell function [von Boxberg et al. 2014]. Filamins are actin



crosslinking proteins involved in actin-based cellular activities via interactions with a large number of other protein partners [Nakamura et al. 2011]. It was recently reported that DRP1, a component of the mitochondrial fission machinery, and filamin A interact in response to hypoxic stress [Nishimura et al. 2018]. Palladin is an actin crosslinking protein originally characterized in the stress fibers of fibroblasts and cardiac myocytes [Parast and Otey 2000]. It is a cytosolic Ig domain containing protein with multiple isoforms [Rachlin and Otey 2006], and roles in organizing the actin cytoskeleton in many structures and cell types [Goicoechea et al. 2008; McLane and Ligon 2015; Sun et al. 2017]. To date little evidence exists for interactions with mitochondria. Cortactin often localizes to the regions of dynamic actin, such as membrane ruffles and lamellipodia, where it mediates actin filament branching through interactions with the Arp2/3 complex [Schnoor et al. 2018]. A recent report has also shown a role for cortactin in the assembly of mitochondria-associated actin structures involved in mitochondrial network morphology and fission [Li et al. 2015]. Miro2, a member of the Ras superfamily of GTPases [Colicelli 2004; Jaffe and Hall 2005], is one of two paralogs that exist in the human genome (the other being Miro1) [Fransson et al. 2003]. Miro/dynein functional interactions have been identified in multiple cell types [Babic et al. 2015; Melkov et al. 2016; Morlino et al. 2014; Russo et al. 2009; van Spronsen et al. 2013], as have Miro/kinesin interactions [Glater et al. 2006] via Milton/Trak/GRIF proteins [Guo et al. 2005; MacAskill et al. 2009a; Stowers et al. 2002].

#### *Ectopic expression of Miro2 enhances weak localization of MYO19<sup>898-970</sup> to mitochondria*

Recently, work from two other research groups have implicated Miro proteins in the stability of MYO19 protein levels in the cell [Lopez-Domenech et al. 2018], and in mitochondria interactions [Oeding et al. 2018]. As the Miro-interacting region of MYO19 does not include the putative monotopic membrane insertion [Shneyer et al. 2016], we chose to compare the mitochondrial localization phenotype observed for MYO19<sup>853-935</sup>-GFP expressed in the presence of mchr-Miro2 and compare that to the phenotype of MYO19<sup>898-970</sup>-GFP expressed in the presence of mchr-Miro2. We examined the enhancement of mitochondrial localization by measuring the ratio of mitochondrial GFP fluorescence to cytosolic GFP fluorescence [Hawthorne et al. 2016] (mito/cyto ratio, Figure 2A). We also examined the penetrance of the phenotype by quantifying the fraction of cells in a population showing diffuse cytoplasmic GFP staining, strong mitochondrial staining, or intermediate staining (Figure 2B). As high levels of fluorescently-tagged MYO19 construct expression can lead to instances where mitochondria-bound MYO19 can be obscured by cytosolic fluorescence (data not shown), and as previous researchers reported that overexpressing Miro constructs impacted mitochondrial morphology and cell function

[Fransson et al. 2003; Liu et al. 2012; Russo et al. 2009], we carried out all of our expression experiments by transfecting low amounts of DNA and completing our observations within 18-30 hours after transfection.

While ectopic expression of mchr-Miro2 enhanced Myo19<sup>898-970</sup>-GFP localization to mitochondria (as determined by the mito/cyto ratio) and increased the fraction of cells with an intermediate or strong mitochondrial localization pattern, mchr-Miro2 did not enhance the mito/cyto ratio for MYO19<sup>835-935</sup>-GFP, nor did it alter the population of cells displaying a mitochondria-localized phenotype. Additionally, it is worth noting that the mito/cyto ratio for cells expressing MYO19<sup>898-970</sup> in the presence of mchr-Miro2 is lower than the mito/cyto ratio for cells expressing MYO19<sup>853-935</sup>-GFP (~3.6 versus ~1.3, respectively). Also, the fraction of cells displaying some mitochondrial localization for cells expressing MYO19<sup>898-970</sup> in the presence of mchr-Miro2 (~35%) is lower than for cells expressing MYO19<sup>853-935</sup>-GFP (~70%). These data suggest that two difference mechanisms exist within the MyMOMA domain for binding to mitochondria outer membrane components.

We hypothesized that the different mechanisms of MOM binding encoded by different regions of the MyMOMA domain would have different affinities that could be revealed by examining the kinetics of the interactions between the mitochondrial outer membrane and each region of the MyMOMA domain. We compared the equilibrium kinetics of exchange through fluorescence recovery after photobleaching analysis (FRAP) and permeabilization activated reduction in fluorescence kinetics (PARF) of GFP label in cells with strong mitochondrial localization [Singh et al. 2016]. For these experiments, we chose to favor Miro2 interactions for the MYO19<sup>898-970</sup>-GFP construct by coexpressing mchr-Miro2. FRAP recovery of MYO19<sup>898-970</sup>-GFP was approximately 30-fold faster than the recovery for MYO19<sup>853-935</sup>-GFP (Figure 2C, Table 1). Additionally, the immobile fraction for MYO19<sup>898-970</sup>-GFP was approximately 15-fold smaller than that calculated for MYO19<sup>853-935</sup>-GFP. PARF analysis indicated that the off-rate kinetics for MYO19<sup>898-970</sup>-GFP were faster, resulting in more complete loss of fluorescence over the time course of the experiment than what was observed for MYO19<sup>853-935</sup>-GFP (Figure 2D, Table 2). While the PARF half-life for loss of MYO19<sup>898-970</sup>-GFP fluorescence was ~80s and the calculated immobile fraction was ~33%, MYO19<sup>853-935</sup>-GFP did not drop below ~70% of its initial fluorescence, so a half-life could not be calculated from conditions with such a large immobile fraction. Taken together, the association data and kinetic data indicate that two mechanisms for mitochondrial outer membrane interaction are encoded by different regions of the MyMOMA domain. The MYO19/Miro2 interaction mediated by amino acids 898-970 is a weaker, faster-exchanging interaction than the interaction mediated by the membrane-inserting  $\alpha$ -helix contained within amino acids 835-935.

Oeding et al. previously reported that mislocalization of Miro1 to endosomes recruited MYO19<sup>898-970</sup> to endosomes [Oeding et al. 2018]. To address whether similar recruitment occurred with Miro2, we relocalized mchr-Miro2 lacking the mitochondrial outer membrane insertion sequence (mchr-Miro2 $\Delta$ TM) to filopodial tips by coexpressing it with a chimeric construct consisting of  $\alpha$ -mcherry nanobody [Fridy et al. 2014] attached to the C-terminus of a MYO10 fragment consisting of the motor domain, lever arm, and coiled-coil region, which we named MYO10-HMM-nanotrap<sup>red</sup> [Bird et al. 2017]. Fluorescently-tagged MYO10 constructs containing the coiled-coil dimerization region are known to localize to filopodial tips [Berg and Cheney 2002]. Coexpression of MYO10-HMM-nanotrap<sup>red</sup> and mchr-Miro2 $\Delta$ TM constructs in conjunction with MYO19<sup>898-970</sup>-GFP resulted in the concentration of mcherry signal at the filopodial tips, but not GFP signal, as indicated by the ratio of filopodial tip intensity to cytoplasmic signal (Supplemental Figure 1A). Coexpression of MYO10-HMM-nanotrap<sup>green</sup> (contains an  $\alpha$ -GFP nanobody instead of an  $\alpha$ -mcherry nanobody), mchr-Miro2 $\Delta$ TM, and MYO19<sup>898-970</sup>-GFP led to concentration of GFP signal at the filopodial tip, but not mcherry signal. To validate whether localization of two labeled constructs to filopodial tips was possible in this system, we coexpressed MYO10-HMM-nanotrap<sup>green</sup>, mchr-Miro2 $\Delta$ TM, and a GFP-tagged nanobody against mcherry [Fridy et al. 2014], GFP-nanotrap<sup>red</sup>. In this instance, both GFP and mcherry signal concentrated at filopodial tips, as indicated by a filopodial tip intensity/cell body intensity ratio greater than 1 in both channels. To ensure that the geometry of filopodia was not interfering with the ability of the constructs to interact, we also localized mchr-Miro2 to the cytosolic face of the nuclear envelope by removing the mitochondrial localization sequence and replacing it with the KASH domain from Syne2 [Razafsky and Hodzic 2009]. High levels of overexpression of the mchr-Miro2-KASH construct led to aggregates and improper localization of the construct, but low expressors showed nuclear envelope localization of the mcherry construct. Coexpression of mchr-Miro2-KASH with MYO19<sup>898-970</sup>-GFP did not recruit the GFP construct to the nuclear membrane (Supplemental Figure 1B), while coexpression of a GFP-nanobody [Rothbauer et al. 2008] targeted to the nuclear envelope via a KASH domain (mchr-nanotrap<sup>green</sup>-KASH) with MYO19<sup>898-970</sup>-GFP did recruit the MYO19 construct to the nuclear envelope, as indicated by a ring of high-intensity fluorescence surrounding the nucleus in both channels. Oeding et.al demonstrated that Miro1 mislocalized to endosomes was capable of recruiting C-terminally tagged GFP-MYO19<sup>898-970</sup>, using a different mislocalization and analysis approach than we employed. Although differences in DNA dose during transfection could accentuate weak interactions in cells expressing high protein levels, these data indicate that functional differences in the ability of Miro1 and Miro2 to interact with binding partners may exist.

### *Miro2-dependent localization of MYO19<sup>898-970</sup> may depend on Miro2 nucleotide state*

One mechanism by which small GTPases interact with their effector proteins is via the formation of a binding surface when in the GTP-bound state where the surface loops known as switch I and switch II are positioned in close proximity [Dvorsky and Ahmadian 2004; Vetter and Wittinghofer 2001]. We hypothesized that such a conformational change might mediate MYO19/Miro2 interactions. To address this possibility, we first examined the conservation of Miro2 sequences across seven vertebrate species (mouse, dingo, human, cow, zebrafish, chicken, and *Xenopus tropicalis*), looking for conservation within switch I and switch II (Supplemental Figure 2). We identified a 6 amino-acid stretch in switch I, XXFPXX, where X represents well-conserved acidic residues. A similar stretch, SXAXQTXXX, was well conserved in switch II (Figure 3A). We had previously identified well conserved, basic residues in the MYO19 tail [Hawthorne et al. 2016], and hypothesized that interactions between a basic patch in MYO19<sup>898-970</sup> and an acidic patch on Miro2 would mediate this interaction (Supplemental Figure 3, Figure 3A). To test this hypothesis, we generated MYO19<sup>898-970</sup>-GFP constructs where K<sup>923</sup>, R<sup>927</sup>, and K<sup>928</sup> were mutated to alanine. When coexpressed with wildtype mchr-Miro2, this combination of constructs did not show enhanced mitochondrial localization as determined by the GFP mito/cyto ratio (Figure 3B), nor did it increase the population of cells displaying an enhanced mitochondrial localization phenotype (Figure 3C). We also generated a mchr-Miro2 construct where 4 acidic residues in switch I and 5 acidic residues in switch II were mutated to alanine. When this construct was coexpressed with wildtype MYO19<sup>898-970</sup>-GFP, this combination did not result in an enhanced GFP mito/cyto ratio, nor did it increase the fraction of cells displaying a mitochondrial localization phenotype (Figure 3B and 3C). FRAP analysis of cells showing mitochondrial localization revealed a 3-fold faster half-life for cells expressing the mutant MYO19<sup>898-970</sup>-GFP and wildtype mchr-Miro2, when compared to cells expressing wildtype MYO19<sup>898-970</sup>-GFP and wildtype mchr-Miro2 (Figure 3D, Table I). The half-life of wildtype MYO19<sup>898-970</sup>-GFP in cells expressing the mutant mchr-Miro2 construct (9.0±1.6s) was similar to that of cells expressing wildtype MYO19<sup>898-970</sup>-GFP and wildtype mchr-Miro2 (9.2±1.7s). This result is likely due to the expression of endogenous Miro1 and Miro2, as we chose cells with clear mitochondrial localization for FRAP analysis.

If the Miro2/MYO19 interaction is indeed mediated by the formation of an acidic patch on Miro2 in a manner that is dependent on the nucleotide state of the N-terminal GTPase [Fransson et al. 2006], then expressing mutant forms of Miro2 predicted to favor either the GTP-bound [Diekmann et al. 1991] or GDP-bound state [Farnsworth and Feig 1991] would influence the ability of the mchr-Miro2 to

interact with MYO19<sup>898-970</sup>-GFP. While expressing mchr-Miro2 A13V (GTP-bound state mimic) in combination with MYO19<sup>898-970</sup>-GFP enhanced the GFP mito/cyto ratio and the fraction of cells showing a mitochondrial localization phenotype at levels similar to wildtype mchr-Miro2, expression of mchr-Miro2 T18N (GDP-bound state mimic) did not enhance either of those two properties (Figure 4B and 4C). FRAP analysis revealed similar equilibrium kinetics for mchr-Miro2 wildtype, mchr-Miro2 A13V, and mchr-Miro2 T18N (Figure 4D, Table 1). Taken together, these data are consistent with an electrostatic interaction between MYO19 and Miro2 that can be regulated by the nucleotide-state of Miro2. Additionally, it also suggests that the nucleotide state of exogenously expressed wildtype mchr-Miro2 is likely the GTP-bound state as the binding properties and kinetic properties of the mchr-Miro2 A13V construct were very similar to those of the mchr-Miro2 wildtype construct.

#### *Implications of a central signaling protein integrating microtubule-based and actin-based motor interactions with mitochondria*

The available proteomics data suggests that MYO19 interacts with or is in close-proximity to a number of proteins involved in mitochondrial functions tied to cytoskeletal activities. We chose to focus on Miro2 initially as it has the potential for being a central regulator of multiple mitochondria/cytoskeleton interactions, including anchoring, fission, and transport. Taken together, our data and previous studies [Lopez-Domenech et al. 2018; Oeding et al. 2018] are elucidating a role for Miro1 and Miro2 in mediating the interaction between MYO19 and mitochondria. Lopez-Domenech and colleagues demonstrated that Miro-knockdown MEFs had significantly decreased levels of MYO19, and that in single-knockouts, Miro2 had a more drastic effect than Miro1 on MYO19 levels. Similarly, Oeding and colleagues demonstrated that cells treated with siRNA for Miro1 and Miro2 also displayed a significant decrease in MYO19 protein levels. Both groups also reported that Miro double knockdown or knockout resulted in more rapid loss of MYO19 protein than in wildtype cells. According to Lopez-Domenech and colleagues, this was proteasome-mediated degradation [Lopez-Domenech et al. 2018]. Interestingly, fluorescently-tagged constructs lacking part of the Miro-interacting domain of MYO19 [Hawthorne et al. 2016] or all of the Miro interacting domain of MYO19 [Shneyer et al. 2016] will still localize to the mitochondrial outer membrane, so long as they contain an intact monotopic membrane inserting  $\alpha$ -helix.

These differences can be explained based on the kinetics of the proteasome degradation machinery, the concentration of available MYO19, and the kinetics of MYO19 membrane insertion. If Miro is providing a fast-exchanging binding site on the mitochondrial membrane for MYO19, then when

MYO19 is in proximity of the mitochondrial membrane rare interactions (like monotopic insertion) are favored over degradation pathways. In this way, initial recruitment of MYO19 to MOM prolongs the lifetime of MYO19 in cells by promoting additional MYO19/MOM interactions that do not require Miro. In cells expressing normal levels of MYO19 and Miro proteins, the facilitation of MYO19 membrane insertion by Miro is sufficient to overcome the proteasome-mediated degradation pathways (Figure 5A). If membrane-inserted MYO19 has a longer half-life than cytosolic MYO19, then the pool of MOM-associated MYO19 is maintained. In the case of cells lacking Miro, cytosolic MYO19 is degraded more quickly than it can be efficiently membrane-inserted, leading to decreased levels of mitochondria associated MYO19 as well as an overall decrease in cellular levels of MYO19 (Figure 5B). In the case of constructs lacking the Miro-interacting domain, ectopic expression leading to higher MYO19 concentrations than under endogenous conditions would lead to more occurrences of rare membrane insertion events. If MYO19 levels are higher than what proteasome-mediated degradation pathways can process, then an appreciable number of membrane-insertion events may still occur. It may also be the case that once membrane-inserted, MYO19/Miro interactions may protect MYO19 from degradation (Figure 5C). This interpretation is consistent with the observation that the turnover of exogenously-expressed, Halo-tagged MYO19 is faster in Miro1/Miro2 double knockdown cells than in wild type HeLa cells [Oeding et al. 2018]. Additionally, Miro1 levels decrease more rapidly than MYO19 levels in FCCP-treated cells [Lopez-Domenech et al. 2018], suggesting that either Miro1 is protecting MYO19 from degradation, or that Miro1 is more readily degraded than MYO19 (or both). Interestingly, inadvertent protection mechanisms may have actually facilitated the discovery of the monotopic membrane-insertion domain by Scheyer, Hawthorne, and their colleagues. Oeding et al. reported that C-terminal tagged MYO19 constructs showed slower degradation than N-terminally tagged MYO19 constructs [Oeding et al. 2018]. Both Hawthorne et al. and Scheyer et al. used C-terminally tagged MYO19 constructs in their studies, and since these constructs were overexpressed and may have been slower to degrade, it would have been easier to identify fluorescence localization to mitochondria even without Miro-facilitated membrane association.

These data all suggest that regulation of the MYO19/Miro interaction would determine how much MYO19 was present on the mitochondrial outer membrane. If Miro followed the same model of other GTPases, a slow intrinsic Miro GTPase activity would be stimulated by GTPase-activating proteins (GAPs), and nucleotide exchange would be stimulated by proteins with guanine nucleotide exchange factor (GEF) activity. An initial report by Fransson and colleagues indicated that ectopically expressed Trak1 and Trak2 interactions with expressed Miro1 or Miro2 were not dependent on the nucleotide

state of the N-terminal Miro GTPase domain [Fransson et al. 2006], is in contrast with the observation by MacAskill and colleagues that ectopically expressed Miro1 T18N recruits ectopically expressed Trak2 more so than Miro1 P13V [MacAskill et al. 2009a]. It is worth noting that differences exist between the cell types and methods used in the two different studies. Our results demonstrate that specific mutations to MYO19 disrupt Miro2-binding, Miro2 switch-mutants disrupt MYO19-binding, and putative nucleotide-state mutants of Miro2 eliminate MYO19 recruitment are all consistent with a system where the MYO19/Miro2 interaction is dependent on the nucleotide state of the N-terminal Miro2 GTPase. These results are in agreement with similar observations made by Oeding and colleagues for inhibition of MYO19-binding to Miro1 T18N [Oeding et al. 2018]. One recent report exists demonstrating weak intrinsic GTPase activity in human Miro GTPases [Peters et al. 2018]. Additionally, Miro1 interacts with the GEF proteins RAP1GDS1 [Ding et al. 2016] and GBF1 [Walch et al. 2018], and alterations in the presence or activity of either RAP1GDS1 or GBF1 lead to changes in mitochondrial morphology. To date Miro-specific GEF activity has not been demonstrated biochemically, and little evidence exists for proteins with Miro-specific GAP activity.

Although Miro1 and Miro2 share ~60% sequence homology and their repertoire of binding-partners may be overlapping, differences in the kinetics of those interactions may indicate related-but-divergent roles in mitochondrial functions, particularly with respect to the role of the actin and microtubule cytoskeleton in mitochondrial dynamics. Lopez-Domenech and colleagues demonstrated such a functional difference. Ectopic expression of the motor adaptor protein, Trak1, had a larger impact on rescuing mitochondrial positioning in Miro1-knockout MEFs compared to Miro2 knockout MEFs. They were also able to demonstrate that Miro2 knockout had a more drastic impact than Miro1 knockout on cellular MYO19 levels, and on the localization of MYO19 to mitochondria [Lopez-Domenech et al. 2018]. We have preliminary evidence that such a functional difference may exist for the Miro proteins with respect to MYO19. We were not able to relocalize MYO19<sup>898-970</sup> constructs to structures containing mislocalized Miro2 (or vice versa), while Oeding and colleagues were able to recruit MYO19<sup>898-970</sup> constructs to mislocalized Miro1 [Oeding et al. 2018]. As Miro1 and Miro2 are differentially expressed within cells and across tissues [Fransson et al. 2003] (Supplemental Figure 4), further investigation of the individual properties of Miro1 and Miro2 will be essential to understanding their roles that Miro proteins and MYO19 play in coordinating cytoskeleton-mediated mitochondrial activities.

## Materials and Methods

### *Construct generation*

MYO19<sup>853-935</sup>-GFP was previously reported [Hawthorne et al. 2016]. Other constructs used in these studies were generated using PFU Ultra II either for PCR mutagenesis or megaprimer PCR insertion [Geiser et al. 2001]. The PCR primers, intended modifications, insert templates, and destination plasmids are listed in Supplemental Table 1. pLKO.1-puro-CMV-TagRFP was purchased from Sigma. PEGFP-C1 was purchased from Clontech. GFP-MYO19<sup>824-970</sup> was previously reported [Quintero et al. 2009]. GFP-Cytob<sub>5</sub>R was a gift from Nica Borgese [Borgese et al. 2001]. myc-BioID2-MCS was a gift from Kyle Roux [Kim et al. 2016] (Addgene plasmid # 74223 ; <http://n2t.net/addgene:74223> ; RRID:Addgene\_74223). mCherry-Lamina-C-18 was a gift from Michael Davidson (Addgene plasmid # 55068 ; <http://n2t.net/addgene:55068> ; RRID:Addgene\_55068). pRK5-myc-Miro2 (Addgene plasmid # 47891 ; <http://n2t.net/addgene:47891> ; RRID:Addgene\_47891), pRK5-myc-Miro2 T18N (Addgene plasmid # 47897 ; <http://n2t.net/addgene:47897> ; RRID:Addgene\_47897), and pRK5-myc-Miro2 Δ593-618 (Addgene plasmid # 47901 ; <http://n2t.net/addgene:47901> ; RRID:Addgene\_47901) were gifts from Pontus Aspenström [Fransson et al. 2003; Fransson et al. 2006]. EGFP-SYNE2 was a gift from Gant Luxton. pcDNA3.1-MYO10-HMM-Nanotrap was a gift from Thomas Friedman (Addgene plasmid # 87255 ; <http://n2t.net/addgene:87255> ; RRID:Addgene\_87255) [Bird et al. 2017]. pGEX6P1-mCherry-Nanobody was a gift from Kazuhisa Nakayama (Addgene plasmid # 70696 ; <http://n2t.net/addgene:70696> ; RRID:Addgene\_70696) [Fridy et al. 2014; Katoh et al. 2016]. All generated plasmids were sequenced completely across their coding region.

### *Cell culture and transfection*

HeLa cells [Scherer et al. 1953] were grown in DMEM high glucose (ThermoFisher) supplemented with 10% fetal bovine serum (Gemini Bio-products) 50 units/mL penicillin, and 50µg/mL streptomycin. Cells were maintained in a humidified incubator at 37°C and 5%CO<sub>2</sub>. Cells were passaged using 0.25% trypsin-EDTA. For imaging experiments, HeLa cells were grown on 22mm glass coverslips (#1.5) pre-treated with 0.01% poly-L-lysine (Electron Microscopy Sciences) and then coated with 10 µg/ml laminin (Cultrex) in PBS for 1h.

Cells were transfected with Lipofectamine 2000 (ThermoFisher) using a modified manufacturer's protocol. For fixed-cell experiments, 0.1µg of GFP-tagged construct DNA were mixed with 0.2µg of



mchr-tagged construct DNA and diluted in Optimem (ThermoFisher) without serum or antibiotics, in a final volume of 150 $\mu$ L per coverslip. In filopodial tip-localization experiments, an additional 0.5  $\mu$ g of MYO10-Nanotrap DNA was added. For live-cell experiments (FRAP or PARF), 0.3 $\mu$ g of GFP-tagged construct DNA were mixed with 0.7 $\mu$ g of mchr-tagged construct DNA and diluted in Optimem (ThermoFisher) without serum or antibiotics, in a final volume of 150 $\mu$ L. In all experiments, 4 $\mu$ L of Lipofectamine was diluted into 150 $\mu$ L of Optimem without serum or antibiotics and then mixed with the DNA dilution. Complexes were allowed to form for 5 minutes at room temperature. The entirety of the DNA/reagent mix was added drop-wise to a well of a 6-well plate. Cells were used for experimentation 18 to 30 hours after transfection.

#### *Establishment of cell lines stably expressing MYO19<sup>824-970</sup>-BioID2*

Lentiviral particles were generated by the Duke University Viral Vector Core Facility as previously described [Vijayraghavan and Kantor 2017]. HeLa cells were grown in growth media supplemented with 8 $\mu$ g/ml hexadimethrine bromide, and infected at a 10:1 multiplicity of infection. After two days of infection, cells were grown in growth media supplemented with 2 $\mu$ g/ml puromycin for 2 weeks. Stable expression of MYO19<sup>824-970</sup>-BioID2 was verified via western blotting and immunostaining. Cells were then trypsinized, resuspended in growth media supplemented with 10%DMSO and 40% fetal bovine serum, aliquoted, and frozen.

#### *Immunostaining*

MYO19<sup>824-970</sup>-BioID2 stable cells were plated on coverslips as previously described, and grown in the presence of 50 $\mu$ M biotin overnight. Prior to fixation, cells were stained with 50nM Mitotracker CMXRos diluted in growth media for 15 minutes, and then incubated in growth media for 15 minutes. Cells were then quickly washed with 37°C PBS, fixed in 4% paraformaldehyde in PBS for 10 minutes at 37°C, and permeabilized in 0.5% TritonX-100 in PBS for 10 minutes. Cells were then blocked (PBS, 1% bovine serum albumin, 0.2% TritonX-100) for 30 minutes, and incubated in mouse  $\alpha$ -myc primary antibody (1:250 in blocking buffer, Invitrogen R950-25) for 1 hour. Cells were then washed in PBS with 0.2% TritonX-100 four times for five minutes, followed by a 1 hour incubation with ALEXA350-streptavidin (1:250, ThermoFisher), ALEXA488 goat  $\alpha$ -mouse secondary antibody (0.2 $\mu$ g/ml, JacksonImmuno), and ALEXA647 phalloidin (1:1000, ThermoFisher) diluted in blocking buffer. After four

5-minute washes in PBS with 0.2% TritonX-100, the cells were mounted on coverslips using PBS in 80% glycerol and 0.5% N-propyl gallate. Coverslips were sealed onto slides with Sally Hansen Tough as Nails clear nail polish.

#### *Streptavidin pulldown*

MYO19<sup>824-970</sup>-BioID2 stable cells were plated in 150mm cell culture dishes. Once they reached approximately 80% confluency, they were grown in the presence of 50 $\mu$ M biotin overnight. Biotinylated proteins were purified as previously described [Mehus et al. 2016]. Briefly, cells were lifted from the plate using 0.25% trypsin EDTA, and washed with PBS via centrifugation (700xg, 4°C, 10 minutes). Cells were resuspended in lysis buffer (50mM Tris HCl, 500mM NaCl, 0.2% SDS, 1mM DTT, 10  $\mu$ g/ml aprotinin, 10 $\mu$ g/ml leupeptin, 1mM PMSF, pH 7.4). TritonX-100 was added to a final concentration of 2%, and the lysate was mixed by inversion. Samples were then placed on ice and sonicated twice (Branson Sonifer 450 Digital, 40% amplitude, 30% duty cycle, 30, 0.5s pulses), with a 2-minute incubation on ice between sonications. Lysates were diluted ~4-fold with 50mM Tris HCl, pH7.4 prior to a third round of sonication. Insoluble material was removed from the lysate via centrifugation (16,500g, 4°C, 10 minutes).

Magnetic streptavidin beads were washed in 50mM Tris HCl, pH7.4 prior to incubation with the lysate supernatant at 4°C with gentle rocking overnight. The sample were then collected to the side of the tube using a magnetic stand. The beads were washed (8 minute incubation time) twice with wash buffer 1 (2% SDS), once with wash buffer 2 (50mM Hepes, 500mM NaCl, 1mM EDTA, 1% TritonX-100, 0.1% deoxycholic acid, pH 7.5), and once with wash buffer 3 (10mM Tris HCl, 250mM LiCl, 1mM EDTA, 0.5% NP-40, 0.5% deoxycholic acid, pH 7.4). The beads were then resuspended in 50mM Tris HCl, pH7.4, with 10% saved for western blot analysis. The remaining sample was resuspended in 50mM ammonium bicarbonate in preparation for mass spectrometry analysis.

#### *Mass spectrometry sample preparation, analysis, data filtering, and bioinformatics*

Samples were subjected to in-solution Trypsin digestion following a RapiGest SF Surfactant (Waters, Part# 186001861, Waters Corporation, 34 Maple St., Milford, MA 01757) elution. Trypsinization was achieved by incubating eluted protein with excess trypsin (Promega V5111) at 37°C overnight (16-18 hours). Subsequently, eluted peptides were desalted using a Pierce C-18 spin column (Thermo 89870)

and followed by an ethyl acetate cleanup step to remove detergents. Peptides were dried down and then re-suspended in 2% Formic Acid LC-MS grade water solution for mass spec analysis.

Peptides were separated using reverse-phase nano-HPLC by a nanoACQUITY UPLC system (Waters Corporation). Peptides were trapped on a 2 cm column (Pepmap 100, 3 $\mu$ M particle size, 100 Å pore size), and separated on a 25cm EASyspray analytical column (75 $\mu$ M ID, 2.0 $\mu$ m C18 particle size, 100 Å pore size) at 45°C. The mobile phases were 0.1% formic acid in water (buffer A) and 0.1% formic acid in acetonitrile (buffer B). A 180-minute gradient of 2-25% buffer B was used with a flow rate of 300nl/min. Mass spectral analysis was performed by a Orbitrap Fusion Lumos mass spectrometer (Thermo Scientific). The ion source was operated at 2.4kV and the ion transfer tube was set to 300°C. Full MS scans (350-2000 m/z) were analyzed in the Orbitrap at a resolution of 120,000 and 1e6 AGC target. The MS2 spectra were collected using a 1.6 m/z isolation width and were analyzed either by the Orbitrap or the linear ion trap depending on peak charge and intensity using a 3s TopSpeed CHOPIN method [Davis et al. 2017]. Orbitrap MS2 scans were acquired at 7500 resolution, with a 5e4 AGC, and 22ms maximum injection time after HCD fragmentation with a normalized energy of 30%. Rapid linear ion trap MS2 scans were acquired using an 4e3 AGC, 250ms maximum injection time after CID 30 fragmentation. Precursor ions were chosen based on intensity thresholds (>1e3) from the full scan as well as on charge states (2-7) with a 30-s dynamic exclusion window. Polysiloxane 371.10124 was used as the lock mass.

Raw mass spectrometry data were searched against the Swiss-Prot human sequence database (released 2/2017) using MaxQuant version 1.6.2.3. The parameters for the search were as follows: specific tryptic digestion with up to two missed cleavages, static carbamidomethyl cysteine modification, variable protein N-terminal acetylation and methionine oxidation, Label Free Quantification (LFQ) and match between runs were enabled. Protein identifications were filtered for a false discovery rate (FDR) of 1%, and potential contaminants and decoys were removed. To score candidate protein-protein interactions, SAINTq version 0.0.4 using LFQ values was used and then filtered for a 10% FDR.

#### *Western blot analysis*

5x Laemmli sample buffer (310mM Tris-HCl pH 6.8, 10% SDS, 50% Glycerol, 2.5% Bromophenol Blue, 7.5%  $\beta$ -Mercaptoethanol) was added to all cell pellet and pulldown samples prior to boiling at 95°C for 5 minutes. Samples were loaded onto a 4-12% Bis-Tris NuPAGE gels, transferred to nitrocellulose,

and transfer was verified by Ponceau staining (0.5% Ponceau Red-S, 2% Acetic acid in H<sub>2</sub>O). Membranes were incubated in blocking buffer (PBS, 0.2% TritonX-100, 1% bovine serum albumin, pH 7.4) for 20 minutes, incubated with streptavidin-HRP (1:5000, ThermoFisher) for 40 minutes, and then washed in PBS three times for 5 minutes. Blots were then exposed to Clarity ECL (Bio-Rad) for 5 minutes, and visualized using the BioRad ChemiDoc MP imager

#### *Fixed-cell preparation and image analysis*

Transfected cells grown on coverslips were stained with 100nM Mitotracker DeepRed FM diluted in growth media for 10 minutes, and then washed in growth media for 10 minutes. Cells were then washed once with PBS quickly prior to fixation in PBS with 4% paraformaldehyde 37°C. After permeabilization in PBS with 0.5% TritonX-100 for 5 minutes, cells were stained in PBS with 75nM DAPI for 10 minutes, washed in PBS four times for five minutes, and mounted on slides using PBS in 80% glycerol and 0.5% N-propyl gallate. Coverslips were sealed onto slides with Sally Hansen Tough as Nails clear nail polish. For experiments using MYO10-Nanotrap constructs, cells were not stained with Mitotracker DeepRed FM, but instead were stained with 6.6nM ALEXA647 phalloidin during the DAPI staining step.

Images were acquired using an Olympus IX-83 microscope and a PLAN APON 60x/1.42NA DIC objective or a PLAN FLUOR 40x/1.3 NA objective. Cells were illuminated using an EXFO mixed gas light source, Sedat Quad filters (Chroma), and Sutter filter wheels & shutters. Images were acquired using a Hamamatsu ORCA-Flash 4.0 V2 sCMOS camera, and Metamorph imaging software to control the system components. In all instances, exposure times maintained constant across experimental data sets.

#### *Quantitative image analysis of fixed cells*

The ratio of organelle-localized fluorescence to cytoplasm-localized fluorescence (mito/cyto ratio) was calculated [Hawthorne et al. 2016] by measuring the integrated density of in-focus organelles and cytosol with 4x4 pixel boxes using FIJI [Schindelin et al. 2012]. For each cell measurement, the ratio was calculated from five separate regions within one cell and then averaged. A ratio with a value greater than 1 indicates that the signal is more concentrated in the organelle region than in the cytosol region. The same analysis method was used to calculate the filopodial tip to cytosol ratio.

The fraction of cells within a population showing a cytoplasmic, mitochondrial, or mixed pattern of GFP fluorescence was calculated by manually scoring 60-100 cells/coverslip for each phenotype. The data collector was blinded to the identity of the samples during data collection. The percentage of cells in each sub-population was calculated by dividing the number of cells with a particular phenotype by the total number of cells counted for that coverslip.

The relative fluorescence along a line crossing the nuclear envelope was calculated using the “Plot Profile” tool in FIJI. The relative brightness at each point along the line was calculated by subtracting the minimum brightness along the line from the brightness at that point. Then that background-adjusted brightness was divided by the background-adjusted maximum fluorescence level along the line.

#### *Live-cell imaging & kinetic analysis*

Transfected HeLa cells were enclosed in a Rose chamber [Rose et al. 1958] filled with Optimum without phenol red containing 50 units/mL penicillin, and 50 $\mu$ g/mL streptomycin. Images were collected on an Olympus FV1200 laser scanning confocal microscope outfitted with a PLAN APON 60x/1.4NA objective at a frame-rate of 1 frame every 2 seconds, or 1 frame every 10 seconds (depending on the sample). After the first 10 frames, regions of interest were illuminated for photobleaching at high laser power for 1 second. FIJI was used to identify regions of interest and calculate average fluorescence intensity for each time point. Relative fluorescence at each time point was measured by determining the fluorescence intensity relative to the frame prior to photobleaching ( $t = 0$ s). Data were corrected for photofading due to imaging [Applewhite et al. 2007] and averaged together. The mean gray value relative to  $t = 0$  was plotted over time and fit to the function  $y = a*(1 - e^{-bt}) + c*(1 - e^{-dt}) + e$ . The half-life ( $t_{1/2}$ ) was calculated using the exponential decay function calculating the value of  $t$  when  $y = 0.5$ . Immobile fraction was calculated by determining the asymptote being approached.

PARF analysis of transfected HeLa cells was completed as previously described [Singh et al. 2016]. Cells were mounted in an open-top Rose chamber filled with with 300 $\mu$ L KHM buffer (pH 7.4, 110 mM potassium acetate, 20 mM HEPES, 2 mM MgCl<sub>2</sub>). Images were acquired at the rate of one frame every 2 seconds. After the first 20 frames, digitonin was added ( $t=0$ ) to a final concentration of 25 $\mu$ M. FIJI was used to select regions of cells not including the nuclei where average fluorescence intensity was

measured for each frame. Fluorescence intensity relative to the frame prior to permeabilization ( $t = 0$ ) was calculated for multiple experiments. These data were corrected for photofading due to imaging, and averaged together. The mean gray value relative to  $t = 0$  was plotted over time and fit to a double exponential function of the form  $y = a + b * e^{(-ct)} + d * e^{(-ft)}$ . The half-life ( $t_{1/2}$ ) was calculated using the exponential decay function calculating the value of  $t$  when  $y = 0.5$ . Immobile fraction was calculated by determining the asymptote being approached.

### *Sequence alignment*

The MYO19 amino acid sequences from seven vertebrates including mammals (human: Q96H55, mouse: NP\_079690, dog: XP\_022278968, cow: NP\_001019672), chicken (XP\_024997806.1), *Xenopus laevis* (AAH92309.1), and zebrafish (XP\_021332051.1), were manually trimmed to the C-terminal sequence containing the third IQ motif and containing the MyMOMA domain. Sequences were aligned using Clustal Omega with standard settings [Sievers et al. 2011]. Amino acid sequences for the N-terminal region of Miro2 (human: NP\_620124.1, mouse: NP\_001351879.1, dingo: XP\_025272941, cow: NP\_847886, chicken: NP\_001074335.1, *Xenopus tropicalis*: NP\_001006725.1, and zebrafish: XP\_021332051.1) were aligned using Clustal Omega with standard settings.

### *Quantification, analysis, and statistics*

Metamorph (Universal Imaging) and FIJI were used for image analysis. Data points are expressed as means  $\pm$  standard error of the mean. Data were compared by Student's t-test, Tukey analysis, or Dunnett's analysis using Kaleidagraph. Exponential fits for PARF and FRAP analysis were performed using Kaleidagraph. Parameters calculated from exponential fits are expressed as mean  $\pm$  the SEM-adjusted fit [Singh et al. 2016], by generating curve fits of the mean + SEM and mean - SEM, and reporting the error as the difference between the value calculated from the mean fit and the value calculated from the SEM-adjusted fit. All images were prepared for publication using FIJI, Metamorph, Photoshop, or some combination of these software packages.

**Figure 1. Putative MYO19 interactors can be identified using proteomic approaches.**

**A)** Cells stably expressing myc-MYO19<sup>824-970</sup>-BioID2 were generated via lentiviral infection, and showed biotinylation of mitochondrial proteins following overnight incubation with 50 $\mu$ M biotin. **B)** HRP-streptavidin blot demonstrating increased biotinylation in HeLa cells stably expressing MYO19<sup>824-970</sup>-BioID2. Samples were loaded for equal cell number, and the affinity bead sample lane from the BioID2 expressing cells shows more bands and darker labeling. **C)** Proteins from three sets of biotin-exposed cells stably expressing MYO19<sup>824-970</sup>-BioID2 were identified via mass spectroscopy. Of the 1420 proteins identified across all samples (including biotin-exposed, control HeLa cells), 665 proteins were not observed in control samples. 57 of those proteins had a SAINT false discovery rate < 0.1. Of those proteins, four were cross-listed in BIOGRID data for MYO19 interactors previously identified by affinity-capture mass spectrometry. Each fluorescence channel in (A) acquired under the same settings and displayed using the same scaling. The scale bar represents 20  $\mu$ m.

**Figure 2. MYO19<sup>898-970</sup> localizes to mitochondria weakly in the presence of Miro2.**

**A)** Mito/cyto ratio was used to quantify the enhancement of mitochondrial localization of MYO19-GFP constructs in the presence of mchr-Miro2. While coexpression of mchr-Miro2 with MYO19<sup>898-970</sup>-GFP enhanced the GFP-localization on mitochondria, mitochondrial localization of MYO19<sup>835-953</sup>-GFP was not enhanced by the coexpression of mchr-Miro2 (\* $p < 0.001$ , t-test between MYO19<sup>898-970</sup>-GFP and MYO19<sup>898-970</sup>-GFPcoexpressed with mchr-Miro2). **B)** Coexpression of mchr-Miro2 decreased the fraction of the population of MYO19<sup>898-970</sup>-GFP expressing cells displaying a cytosolic staining pattern for GFP, but expression of mchr-Miro2 did not alter the population of MYO19<sup>853-935</sup>-GFP expressing cells with a cytosolic GFP pattern, further implicating Miro2 in localizing MYO19 to mitochondria (\*  $p < 0.05$ , compared to MYO19<sup>898-970</sup>-GFP, Tukey analysis). **C)** FRAP analysis of MYO19<sup>853-935</sup>-GFP expressing cells is relatively slow with a large immobile fraction, when compared to MYO19<sup>898-970</sup>-GFP in cells expressing mchr-Miro2, suggesting that the mechanism of interaction with mitochondria for these two regions of MYO19 differs. **D)** This is further supported by PARF analysis showing that MYO19<sup>853-935</sup>-GFP dissociates more slowly and has a larger immobile fraction than either MYO19<sup>898-970</sup>-GFP or MYO19<sup>898-970</sup>-GFP coexpressed with mchr-Miro2. Numbers at the base of the bars indicate the number of replicates. Error bars represent standard error of the mean. FRAP and PARF kinetic parameters are listed in Table 1 and Table 2, respectively.

**Figure 3. A subset of well-conserved, charged residues are essential for Miro2-dependent localization of MYO19<sup>898-970</sup>.**

**A)** Clustal Omega multiple sequence alignments of the MYO19 MyMOMA domain and the Miro2 N-terminal GTPase domain identified well-conserved, charged residues in each domain, which were mutated to alanine to determine their contribution to the MYO19/Miro2 interaction. **B)** Mutating the basic residues in MYO19<sup>898-970</sup>-GFP to alanine or the acidic residues in mchr-Miro2 to alanine decreased the localization of MYO19<sup>898-970</sup>-GFP to mitochondria, as determined by the mito/cyto ratio (\*p <0.05, Dunnett's test versus MYO19<sup>898-970</sup>-GFP wildtype coexpressed with mchr-Miro2 wildtype). **C)** Mutations similarly decreased the fraction of cells displaying a cytosolic staining pattern for GFP, whether those mutations were to MYO19 or Miro2 (\*p <0.05, Dunnett's test versus MYO19<sup>898-970</sup>-GFP wildtype coexpressed with mchr-Miro2 wildtype). **D)** FRAP analysis of MYO19<sup>898-970</sup>-GFP mutant shows faster exchange kinetics than wildtype, consistent with basic residues in the MYO19 mediating interactions with Miro2. Multiple sequence alignments can be found in the supplemental materials. Numbers at the base of the bars indicate the number of replicates. Error bars represent standard error of the mean. FRAP kinetic parameters are listed in Table 1.

**Figure 4. Miro2-dependent localization of MYO19<sup>898-970</sup> may depend on the nucleotide state of Miro2.**

**A)** Point mutations made to the N-terminal domain of Miro2 are thought to result in the GTPase being in the GTP-bound (A13V) or GDP-bound (T18N) state. **B)** Expressing the putative GDP-bound mchr-Miro2 T18N mutant decreased the localization of MYO19<sup>898-970</sup>-GFP to mitochondria while the putative GTP-bound A13V mutant did not, as determined by the mito/cyto ratio (\*p <0.05, Dunnett's test versus MYO19<sup>898-970</sup>-GFP coexpressed with mchr-Miro2 wildtype). **C)** Expression of mchr-Miro2 T18N increased the fraction of cells displaying a cytosolic staining pattern for GFP (\*p <0.05, Dunnett's test versus MYO19<sup>898-970</sup>-GFP coexpressed with mchr-Miro2 wildtype). **D)** FRAP analysis of MYO19<sup>898-970</sup>-GFP with wildtype or GTP-state mutants shows similar exchange kinetics of MYO19<sup>898-970</sup>-GFP for all three conditions. For the mchr-Miro2 T18N, this is likely due to endogenous Miro recruiting MYO19<sup>898-970</sup>-GFP. Numbers at the base of the bars indicate the number of replicates. Error bars represent standard error of the mean. FRAP kinetic parameters are listed in Table 1.

**Figure 5. A conceptual model for how Miro/MYO19 interactions facilitate membrane insertion and influence MYO19 degradation.**



The presence of MYO19 on the mitochondrial outer membrane is a consequence of the balance of membrane-insertion events, and degradation pathways. **A)** Mechanisms that facilitate the removal of MYO19 protein from cytosolic populations to membrane-bound populations, such as Miro interactions, would result in the presence of MYO19 in the mitochondrial outer membrane. **B)** Loss of Miro interactions would favor proteasome-mediated MYO19 degradation, resulting in decreased mitochondrial MYO19 as well as decreased cellular levels of MYO19 protein. **C)** It is also possible that membrane-inserted MYO19 interacts with Miro in such a way as to protect MYO19 from degradation. These conceptual models are not drawn to scale.

**Table 1: FRAP kinetic analysis for proteins used in this study.**

| <b>Construct</b>                                         | <b><math>t_{1/2}</math> (s)</b> | <b>Immobile</b> | <b>R</b> | <b>n</b> |
|----------------------------------------------------------|---------------------------------|-----------------|----------|----------|
| MYO19 <sup>853-935</sup> -GFP                            | 599±220                         | 0.47±0.03       | 0.9935   | 31       |
| MYO19 <sup>898-970</sup> -GFP/mchr-Miro2 wt*             | 9.2±1.7                         | 0.03±0.02       | 0.9986   | 39       |
| MYO19 <sup>898-970</sup> -GFP <b>mut.</b> /mchr-Miro2 wt | 1.5±0.3                         | 0.04±0.06       | 0.9925   | 21       |
| MYO19 <sup>898-970</sup> -GFP/mchr-Miro2 <b>mut.</b>     | 9.0±1.6                         | 0.06±0.01       | 0.9981   | 19       |
| MYO19 <sup>898-970</sup> -GFP/mchr-Miro2 <b>A13V</b>     | 8.0±0.9                         | 0.14±0.02       | 0.9995   | 18       |
| MYO19 <sup>898-970</sup> -GFP/mchr-Miro2 <b>T18N</b>     | 17±4.0                          | 0.16±0.02       | 0.9994   | 20       |

\*combination of all MYO19<sup>898-970</sup>-GFP/mchr-Miro2 samples across all trials

**Table 2: PARF kinetic analysis for proteins used in this study**

| <b>Construct</b>                            | <b><math>t_{1/2}</math> (s)</b> | <b>Immobile</b> | <b>R</b> | <b>n</b> |
|---------------------------------------------|---------------------------------|-----------------|----------|----------|
| MYO19 <sup>853-935</sup> -GFP               | -                               | 0.69±0.04       | 0.9531   | 49       |
| MYO19 <sup>898-970</sup> -GFP               | 13±4.3                          | 0.12±0.03       | 0.9926   | 16       |
| MYO19 <sup>898-970</sup> -GFP/mchr-Miro2 wt | 83±12                           | 0.33±0.02       | 0.9976   | 44       |

**Supplemental Figure 1: Mislocalization of Miro2 to either filopodial tips or the nuclear envelope does not recruit MYO19<sup>898-970</sup>-GFP to either location. A)**

mchr-Miro2 was mislocalized by removing the C-terminal mitochondrial outer membrane domain (mchr-Miro2 $\Delta$ TM). When coexpressed with MYO10-Nanotrap<sup>red</sup> and MYO19<sup>898-970</sup>-GFP, mchr-Miro2 $\Delta$ TM localized to filopodial tips but GFP signal did not concentrate with it. When MYO19<sup>898-970</sup>-GFP, mchr-Miro2 $\Delta$ TM, and MYO10-Nanotrap<sup>green</sup> were coexpressed, GFP signal collected at filopodial tips but mcherry signal did not. When GFP-Nanotrap<sup>red</sup>, mchr-Miro2 $\Delta$ TM, and MYO10-Nanotrap<sup>green</sup> were coexpressed, both GFP and mcherry signal localized to filopodial tips. Bar graphs indicate the ratio of filopodial tip fluorescence to cell body fluorescence for 6 filopodia in the image. Ratios above 1 indicate fluorescence concentration at the filopodial tip. Note that the only instance where the TCB ratio is above one in both channels is

GFP-Nanotrap<sup>red</sup>/mchr-Miro2 $\Delta$ TM/MYO10-Nanotrap<sup>green</sup>. Error bars represent standard error of the mean. **B)** GFP-SYNE2 contains a C-terminal KASH domain which localizes the protein to the cytosolic face of the nuclear membrane. Cells coexpressing mchr-Nanotrap<sup>green</sup>-KASH and MYO19<sup>898-970</sup>-GFP show mcherry localization and GFP localization at the nuclear membrane. Cells coexpressing mchr-Miro2-KASH and MYO19<sup>898-970</sup>-GFP show mcherry localization at the nuclear membrane but not concentration of GFP signal. Linescans across the border between the nucleus and cytosol indicate regions of high brightness at the nuclear periphery for both channels in MYO19<sup>898-970</sup>-GFP/mchr-Nanotrap<sup>green</sup>-KASH cells, but not in MYO19<sup>898-970</sup>/mchr-Miro2-KASH cells. Graphs represent the average relative brightness across a 3 $\mu$ m region for six cells. Scale bar = 10  $\mu$ m.

**Supplemental Figure 2: Multiple sequence alignment of seven vertebrate Miro2 N-terminal GTPase domains reveals well-conserved acidic residues within switch I and switch II.**

Full-length Miro2 sequences for seven species (human: NP\_620124.1, mouse: NP\_001351879.1, dingo: XP\_025272941, cow: NP\_847886, chicken: NP\_001074335.1, *Xenopus tropicalis*: NP\_001006725.1, and zebrafish: XP\_021332051.1) were aligned using Clustal Omega with standard settings. Positions with a single, fully conserved residue are indicated by an asterisk (\*). Positions with strongly conserved residues are indicated by a colon (:). Positions with weakly conserved residues are indicated by a period(.).

**Supplemental Figure 3: Multiple sequence alignment of seven vertebrate MYO19 MyMOMA domains reveals well-conserved basic residues.**

The MYO19 amino acid sequences from seven vertebrates

(human: Q96H55, mouse: NP\_079690, dog: XP\_022278968, cow: NP\_001019672, chicken: XP\_024997806.1, *Xenopus laevis*: AAH92309.1, and zebrafish: XP\_021332051.1) were manually trimmed to the C-terminal sequence containing the third IQ motif and containing the MyMOMA domain. Sequences were aligned using Clustal Omega with standard settings. Positions with a single, fully conserved residue are indicated by an asterisk (\*). Positions with strongly conserved residues are indicated by a colon (:). Positions with weakly conserved residues are indicated by a period(.).

**Supplemental Figure 4: Expression analysis based on expressed sequence tags (EST) suggest differential expression across multiple tissues and cellular states between Miro1 and Miro2.** Human gene expression profiles by Unigene estimate relative gene expression levels for Miro1 (Hs.655325) and Miro2 (Hs.513242). These estimates suggest differences in expression levels between Miro1 and Miro2 in **A)** a variety of tissues as well as **B)** by health state and developmental stage. Results downloaded from <https://www.ncbi.nlm.nih.gov/unigene> on March 30, 2019.

**Supplemental Table 1: Primers and plasmids used to generate the expression constructs for these studies.**

**Supplemental Table 2: Promiscuous biotinylation results for MYO19<sup>824-970</sup>-BioID2.** HeLa cells stably expressing MYO19<sup>824-970</sup>-BioID2 were grown in the presence of 50µM biotin overnight. The fraction of biotinylated proteins were purified, analyzed by mass spectrometry, and compared to biotin-exposed cells not expressing a BioID2 construct. This excel file contains the MaxQuant and SAINT analysis results, as well as THEBIOGRID affinity pulldown data for MYO19 (accessed on March 29, 2019), which was used as a comparison in order to identify putative MYO19 interactors. Proteins identified by Oeding et al. [Oeding et al. 2018] are indicated in bold on the “SAINT analysis” tab.

- Adikes RC, Unrath WC, Yengo CM, Quintero OA. 2013. Biochemical and bioinformatic analysis of the myosin-XIX motor domain. *Cytoskeleton (Hoboken)* 70(5):281-95.
- Applewhite DA, Barzik M, Kojima S, Svitkina TM, Gertler FB, Borisy GG. 2007. Ena/VASP proteins have an anti-capping independent function in filopodia formation. *Mol Biol Cell* 18(7):2579-91.
- Babic M, Russo GJ, Wellington AJ, Sangston RM, Gonzalez M, Zinsmaier KE. 2015. Miro's N-terminal GTPase domain is required for transport of mitochondria into axons and dendrites. *J Neurosci* 35(14):5754-71.
- Berg JS, Cheney RE. 2002. Myosin-X is an unconventional myosin that undergoes intrafilopodial motility. *Nat Cell Biol* 4(3):246-50.
- Bird JE, Barzik M, Drummond MC, Sutton DC, Goodman SM, Morozko EL, Cole SM, Boukhvalova AK, Skidmore J, Syam D and others. 2017. Harnessing molecular motors for nanoscale pulldown in live cells. *Mol Biol Cell* 28(3):463-475.
- Boldt K, van Reeuwijk J, Lu Q, Koutroumpas K, Nguyen TM, Texier Y, van Beersum SE, Horn N, Willer JR, Mans DA and others. 2016. An organelle-specific protein landscape identifies novel diseases and molecular mechanisms. *Nat Commun* 7:11491.
- Borgese N, Gazzoni I, Barberi M, Colombo S, Pedrazzini E. 2001. Targeting of a tail-anchored protein to endoplasmic reticulum and mitochondrial outer membrane by independent but competing pathways. *Molecular Biology of the Cell* 12(8):2482-2496.
- Chen Y, Sheng ZH. 2013. Kinesin-1-syntaphilin coupling mediates activity-dependent regulation of axonal mitochondrial transport. *J Cell Biol* 202(2):351-64.
- Chernoivanenko IS, Matveeva EA, Gelfand VI, Goldman RD, Minin AA. 2015. Mitochondrial membrane potential is regulated by vimentin intermediate filaments. *FASEB J* 29(3):820-7.
- Choi H, Larsen B, Lin ZY, Breikreutz A, Mellacheruvu D, Fermin D, Qin ZS, Tyers M, Gingras AC, Nesvizhskii AI. 2011. SAINT: probabilistic scoring of affinity purification-mass spectrometry data. *Nat Methods* 8(1):70-3.
- Choudhury NR, Heikel G, Trubitsyna M, Kubik P, Nowak JS, Webb S, Granneman S, Spanos C, Rappsilber J, Castello A and others. 2017. RNA-binding activity of TRIM25 is mediated by its PRY/SPRY domain and is required for ubiquitination. *BMC Biol* 15(1):105.
- Colicelli J. 2004. Human RAS superfamily proteins and related GTPases. *Sci STKE* 2004(250):RE13.
- Collins TJ, Berridge MJ, Lipp P, Bootman MD. 2002. Mitochondria are morphologically and functionally heterogeneous within cells. *EMBO J* 21(7):1616-27.
- Collins TJ, Bootman MD. 2003. Mitochondria are morphologically heterogeneous within cells. *J Exp Biol* 206(Pt 12):1993-2000.

- Colombini M. 2012. Mitochondrial outer membrane channels. *Chem Rev* 112(12):6373-87.
- Cox J, Mann M. 2008. MaxQuant enables high peptide identification rates, individualized p.p.b.-range mass accuracies and proteome-wide protein quantification. *Nat Biotechnol* 26(12):1367-72.
- Davis S, Charles PD, He L, Mowlds P, Kessler BM, Fischer R. 2017. Expanding Proteome Coverage with CHarge Ordered Parallel Ion aNalysis (CHOPIN) Combined with Broad Specificity Proteolysis. *J Proteome Res* 16(3):1288-1299.
- Davis TA, Loos B, Engelbrecht AM. 2014. AHNAK: the giant jack of all trades. *Cell Signal* 26(12):2683-93.
- Diekmann D, Brill S, Garrett MD, Totty N, Hsuan J, Monfries C, Hall C, Lim L, Hall A. 1991. Bcr encodes a GTPase-activating protein for p21rac. *Nature* 351(6325):400-2.
- Ding L, Lei Y, Han Y, Li Y, Ji X, Liu L. 2016. Vimar Is a Novel Regulator of Mitochondrial Fission through Miro. *PLoS Genet* 12(10):e1006359.
- DuBoff B, Gotz J, Feany MB. 2012. Tau promotes neurodegeneration via DRP1 mislocalization in vivo. *Neuron* 75(4):618-32.
- Dvorsky R, Ahmadian MR. 2004. Always look on the bright site of Rho: structural implications for a conserved intermolecular interface. *EMBO Rep* 5(12):1130-6.
- Farnsworth CL, Feig LA. 1991. Dominant inhibitory mutations in the Mg(2+)-binding site of RasH prevent its activation by GTP. *Mol Cell Biol* 11(10):4822-9.
- Fransson A, Ruusala A, Aspenstrom P. 2003. Atypical Rho GTPases have roles in mitochondrial homeostasis and apoptosis. *J Biol Chem* 278(8):6495-502.
- Fransson S, Ruusala A, Aspenstrom P. 2006. The atypical Rho GTPases Miro-1 and Miro-2 have essential roles in mitochondrial trafficking. *Biochem Biophys Res Commun* 344(2):500-10.
- Fridy PC, Li Y, Keegan S, Thompson MK, Nudelman I, Scheid JF, Oeffinger M, Nussenzweig MC, Fenyo D, Chait BT and others. 2014. A robust pipeline for rapid production of versatile nanobody repertoires. *Nat Methods* 11(12):1253-60.
- Friedman JR, Nunnari J. 2014. Mitochondrial form and function. *Nature* 505(7483):335-43.
- Geiser M, Cebe R, Drewello D, Schmitz R. 2001. Integration of PCR fragments at any specific site within cloning vectors without the use of restriction enzymes and DNA ligase. *Biotechniques* 31(1):88-90, 92.
- Giurato G, Nassa G, Salvati A, Alexandrova E, Rizzo F, Nyman TA, Weisz A, Tarallo R. 2018. Quantitative mapping of RNA-mediated nuclear estrogen receptor beta interactome in human breast cancer cells. *Sci Data* 5:180031.

- Glater EE, Megeath LJ, Stowers RS, Schwarz TL. 2006. Axonal transport of mitochondria requires milton to recruit kinesin heavy chain and is light chain independent. *J Cell Biol* 173(4):545-57.
- Goicoechea SM, Arneman D, Otey CA. 2008. The role of palladin in actin organization and cell motility. *Eur J Cell Biol* 87(8-9):517-25.
- Griparic L, van der Bliek AM. 2001. The many shapes of mitochondrial membranes. *Traffic* 2(4):235-44.
- Guo X, Macleod GT, Wellington A, Hu F, Panchumarthi S, Schoenfield M, Marin L, Charlton MP, Atwood HL, Zinsmaier KE. 2005. The GTPase dMiro is required for axonal transport of mitochondria to Drosophila synapses. *Neuron* 47(3):379-93.
- Haase H, Pagel I, Khalina Y, Zacharzowsky U, Person V, Lutsch G, Petzhold D, Kott M, Schaper J, Morano I. 2004. The carboxyl-terminal ahnak domain induces actin bundling and stabilizes muscle contraction. *FASEB J* 18(7):839-41.
- Hatch AL, Ji WK, Merrill RA, Strack S, Higgs HN. 2016. Actin filaments as dynamic reservoirs for Drp1 recruitment. *Mol Biol Cell* 27(20):3109-3121.
- Hawthorne JL, Mehta PR, Singh PP, Wong N, Quintero OA. 2016. Positively charged residues within the MYO19 MyMOMA domain are essential for proper localization of MYO19 to the mitochondrial outer membrane. *Cytoskeleton* 73(6):286-299.
- Hein MY, Hubner NC, Poser I, Cox J, Nagaraj N, Toyoda Y, Gak IA, Weisswange I, Mansfeld J, Buchholz F and others. 2015. A human interactome in three quantitative dimensions organized by stoichiometries and abundances. *Cell* 163(3):712-23.
- Huttlin EL, Bruckner RJ, Paulo JA, Cannon JR, Ting L, Baltier K, Colby G, Gebreab F, Gygi MP, Parzen H and others. 2017. Architecture of the human interactome defines protein communities and disease networks. *Nature* 545(7655):505-509.
- Huttlin EL, Ting L, Bruckner RJ, Gebreab F, Gygi MP, Szpyt J, Tam S, Zarraga G, Colby G, Baltier K and others. 2015. The BioPlex Network: A Systematic Exploration of the Human Interactome. *Cell* 162(2):425-440.
- Jaffe AB, Hall A. 2005. Rho GTPases: biochemistry and biology. *Annu Rev Cell Dev Biol* 21:247-69.
- Ji WK, Hatch AL, Merrill RA, Strack S, Higgs HN. 2015. Actin filaments target the oligomeric maturation of the dynamin GTPase Drp1 to mitochondrial fission sites. *Elife* 4:e11553.
- John GB, Shang Y, Li L, Renken C, Mannella CA, Selker JM, Rangell L, Bennett MJ, Zha J. 2005. The mitochondrial inner membrane protein mitofilin controls cristae morphology. *Mol Biol Cell* 16(3):1543-54.
- Kang JS, Tian JH, Pan PY, Zald P, Li C, Deng C, Sheng ZH. 2008. Docking of axonal mitochondria by syntaphilin controls their mobility and affects short-term facilitation. *Cell* 132(1):137-48.

- Katoh Y, Terada M, Nishijima Y, Takei R, Nozaki S, Hamada H, Nakayama K. 2016. Overall Architecture of the Intraflagellar Transport (IFT)-B Complex Containing Cluap1/IFT38 as an Essential Component of the IFT-B Peripheral Subcomplex. *J Biol Chem* 291(21):10962-75.
- Khanna R, Krishnamoorthy V, Parnaik VK. 2018. E3 ubiquitin ligase RNF123 targets lamin B1 and lamin-binding proteins. *FEBS J* 285(12):2243-2262.
- Kim DI, Jensen SC, Noble KA, Kc B, Roux KH, Motamedchaboki K, Roux KJ. 2016. An improved smaller biotin ligase for BioID proximity labeling. *Mol Biol Cell* 27(8):1188-96.
- Klosowiak JL, Focia PJ, Chakravarthy S, Landahl EC, Freymann DM, Rice SE. 2013. Structural coupling of the EF hand and C-terminal GTPase domains in the mitochondrial protein Miro. *EMBO Rep* 14(11):968-74.
- Korobova F, Gauvin TJ, Higgs HN. 2014. A role for myosin II in mammalian mitochondrial fission. *Curr Biol* 24(4):409-14.
- Korobova F, Ramabhadran V, Higgs HN. 2013. An actin-dependent step in mitochondrial fission mediated by the ER-associated formin INF2. *Science* 339(6118):464-7.
- Kruppa AJ, Kishi-Itakura C, Masters TA, Rorbach JE, Grice GL, Kendrick-Jones J, Nathan JA, Minczuk M, Buss F. 2018. Myosin VI-Dependent Actin Cages Encapsulate Parkinson-Positive Damaged Mitochondria. *Dev Cell* 44(4):484-499 e6.
- Li S, Xu S, Roelofs BA, Boyman L, Lederer WJ, Sesaki H, Karbowski M. 2015. Transient assembly of F-actin on the outer mitochondrial membrane contributes to mitochondrial fission. *J Cell Biol* 208(1):109-23.
- Liu S, Sawada T, Lee S, Yu W, Silverio G, Alapatt P, Millan I, Shen A, Saxton W, Kanao T and others. 2012. Parkinson's disease-associated kinase PINK1 regulates Miro protein level and axonal transport of mitochondria. *PLoS Genet* 8(3):e1002537.
- Lopez-Domenech G, Covill-Cooke C, Ivankovic D, Halff EF, Sheehan DF, Norkett R, Birsa N, Kittler JT. 2018. Miro proteins coordinate microtubule- and actin-dependent mitochondrial transport and distribution. *EMBO J* 37(3):321-336.
- Lopez-Domenech G, Higgs NF, Vaccaro V, Ros H, Arancibia-Carcamo IL, MacAskill AF, Kittler JT. 2016. Loss of Dendritic Complexity Precedes Neurodegeneration in a Mouse Model with Disrupted Mitochondrial Distribution in Mature Dendrites. *Cell Rep* 17(2):317-327.
- Lu Z, Ma XN, Zhang HM, Ji HH, Ding H, Zhang J, Luo D, Sun Y, Li XD. 2014. Mouse myosin-19 is a plus-end-directed, high-duty ratio molecular motor. *J Biol Chem* 289(26):18535-48.
- MacAskill AF, Brickley K, Stephenson FA, Kittler JT. 2009a. GTPase dependent recruitment of Grif-1 by Miro1 regulates mitochondrial trafficking in hippocampal neurons. *Mol Cell Neurosci* 40(3):301-12.

- Macaskill AF, Rinholm JE, Twelvetrees AE, Arancibia-Carcamo IL, Muir J, Fransson A, Aspenstrom P, Attwell D, Kittler JT. 2009b. Miro1 is a calcium sensor for glutamate receptor-dependent localization of mitochondria at synapses. *Neuron* 61(4):541-55.
- Manor U, Bartholomew S, Golani G, Christenson E, Kozlov M, Higgs H, Spudich J, Lippincott-Schwartz J. 2015. A mitochondria-anchored isoform of the actin-nucleating Spire protein regulates mitochondrial division. *eLife*:10.7554/eLife.08828.
- McLane JS, Ligon LA. 2015. Palladin mediates stiffness-induced fibroblast activation in the tumor microenvironment. *Biophys J* 109(2):249-64.
- Mehta K, Chacko LA, Chug MK, Jhunjhunwala S, Ananthanarayanan V. 2019. Association of mitochondria with microtubules inhibits mitochondrial fission by precluding assembly of the fission protein Dnm1. *J Biol Chem* 294(10):3385-3396.
- Mehus AA, Anderson RH, Roux KJ. 2016. BioID Identification of Lamin-Associated Proteins. *Methods Enzymol* 569:3-22.
- Melkov A, Baskar R, Alcalay Y, Abdu U. 2016. A new mode of mitochondrial transport and polarized sorting regulated by Dynein, Milton and Miro. *Development* 143(22):4203-4213.
- Misko A, Jiang S, Wegorzewska I, Milbrandt J, Baloh RH. 2010. Mitofusin 2 is necessary for transport of axonal mitochondria and interacts with the Miro/Milton complex. *J Neurosci* 30(12):4232-40.
- Mitra K. 2013. Mitochondrial fission-fusion as an emerging key regulator of cell proliferation and differentiation. *Bioessays* 35(11):955-64.
- Moore AS, Wong YC, Simpson CL, Holzbaur EL. 2016. Dynamic actin cycling through mitochondrial subpopulations locally regulates the fission-fusion balance within mitochondrial networks. *Nat Commun* 7:12886.
- Morlino G, Barreiro O, Baixauli F, Robles-Valero J, Gonzalez-Granado JM, Villa-Bellosta R, Cuenca J, Sanchez-Sorzano CO, Veiga E, Martin-Cofreces NB and others. 2014. Miro-1 links mitochondria and microtubule Dynein motors to control lymphocyte migration and polarity. *Mol Cell Biol* 34(8):1412-26.
- Nakamura F, Stossel TP, Hartwig JH. 2011. The filamins: organizers of cell structure and function. *Cell Adh Migr* 5(2):160-9.
- Nekrasova OE, Mendez MG, Chernouvanenko IS, Tyurin-Kuzmin PA, Kuczmarski ER, Gelfand VI, Goldman RD, Minin AA. 2011. Vimentin intermediate filaments modulate the motility of mitochondria. *Mol Biol Cell* 22(13):2282-9.
- Nishimura A, Shimauchi T, Tanaka T, Shimoda K, Toyama T, Kitajima N, Ishikawa T, Shindo N, Numaga-Tomita T, Yasuda S and others. 2018. Hypoxia-induced interaction of filamin with Drp1 causes mitochondrial hyperfission-associated myocardial senescence. *Sci Signal* 11(556).



- Odgren PR, Toukatly G, Bangs PL, Gilmore R, Fey EG. 1996. Molecular characterization of mitofilin (HMP), a mitochondria-associated protein with predicted coiled coil and intermembrane space targeting domains. *J Cell Sci* 109 ( Pt 9):2253-64.
- Odrionitz F, Kollmar M. 2007. Drawing the tree of eukaryotic life based on the analysis of 2,269 manually annotated myosins from 328 species. *Genome Biol* 8(9):R196.
- Oeding SJ, Majstrowicz K, Hu XP, Schwarz V, Freitag A, Honnert U, Nikolaus P, Bahler M. 2018. Identification of Miro as a mitochondrial receptor for myosin XIX. *J Cell Sci*.
- Parast MM, Otey CA. 2000. Characterization of palladin, a novel protein localized to stress fibers and cell adhesions. *J Cell Biol* 150(3):643-56.
- Pathak D, Sepp KJ, Hollenbeck PJ. 2010. Evidence that myosin activity opposes microtubule-based axonal transport of mitochondria. *J Neurosci* 30(26):8984-92.
- Perdiz D, Lorin S, Leroy-Gori I, Pous C. 2017. Stress-induced hyperacetylation of microtubule enhances mitochondrial fission and modulates the phosphorylation of Drp1 at (616)Ser. *Cell Signal* 39:32-43.
- Peters DT, Kay L, Eswaran J, Lakey JH, Soundararajan M. 2018. Human Miro Proteins Act as NTP Hydrolases through a Novel, Non-Canonical Catalytic Mechanism. *Int J Mol Sci* 19(12).
- Quintero OA, DiVito MM, Adikes RC, Kortan MB, Case LB, Lier AJ, Panaretos NS, Slater SQ, Rengarajan M, Feliu M and others. 2009. Human Myo19 is a novel myosin that associates with mitochondria. *Curr Biol* 19(23):2008-13.
- Rachlin AS, Otey CA. 2006. Identification of palladin isoforms and characterization of an isoform-specific interaction between Lasp-1 and palladin. *J Cell Sci* 119(Pt 6):995-1004.
- Ramos SV, Hughes MC, Perry CGR. 2019. Altered skeletal muscle microtubule-mitochondrial VDAC2 binding is related to bioenergetic impairments after paclitaxel but not vinblastine chemotherapies. *Am J Physiol Cell Physiol* 316(3):C449-C455.
- Razafsky D, Hodzic D. 2009. Bringing KASH under the SUN: the many faces of nucleocytoskeletal connections. *J Cell Biol* 186(4):461-72.
- Rohn JL, Patel JV, Neumann B, Bulkescher J, McHedlishvili N, McMullan RC, Quintero OA, Ellenberg J, Baum B. 2014. Myo19 ensures symmetric partitioning of mitochondria and coupling of mitochondrial segregation to cell division. *Curr Biol* 24(21):2598-605.
- Rose GG, Pomerat CM, Shindler TO, Trunnell JB. 1958. A cellophane-strip technique for culturing tissue in multipurpose culture chambers. *J Biophys Biochem Cytol* 4(6):761-4.
- Rothbauer U, Zolghadr K, Muyldermans S, Schepers A, Cardoso MC, Leonhardt H. 2008. A versatile nanotrap for biochemical and functional studies with fluorescent fusion proteins. *Mol Cell Proteomics* 7(2):282-9.

- Roux KJ, Kim DI, Raida M, Burke B. 2012. A promiscuous biotin ligase fusion protein identifies proximal and interacting proteins in mammalian cells. *J Cell Biol* 196(6):801-10.
- Russo GJ, Louie K, Wellington A, Macleod GT, Hu F, Panchumarthi S, Zinsmaier KE. 2009. *Drosophila* Miro is required for both anterograde and retrograde axonal mitochondrial transport. *J Neurosci* 29(17):5443-55.
- Saks V, Belikova Y, Vasilyeva E, Kuznetsov A, Fontaine E, Keriél C, Leverve X. 1995. Correlation between degree of rupture of outer mitochondrial membrane and changes of kinetics of regulation of respiration by ADP in permeabilized heart and liver cells. *Biochem Biophys Res Commun* 208(3):919-26.
- Saotome M, Safiulina D, Szabadkai G, Das S, Fransson A, Aspenstrom P, Rizzuto R, Hajnoczky G. 2008. Bidirectional Ca<sup>2+</sup>-dependent control of mitochondrial dynamics by the Miro GTPase. *Proc Natl Acad Sci U S A* 105(52):20728-33.
- Saxton WM, Hollenbeck PJ. 2012. The axonal transport of mitochondria. *J Cell Sci* 125(Pt 9):2095-104.
- Scherer WF, Syverton JT, Gey GO. 1953. Studies on the propagation in vitro of poliomyelitis viruses. IV. Viral multiplication in a stable strain of human malignant epithelial cells (strain HeLa) derived from an epidermoid carcinoma of the cervix. *J Exp Med* 97(5):695-710.
- Schindelin J, Arganda-Carreras I, Frise E, Kaynig V, Longair M, Pietzsch T, Preibisch S, Rueden C, Saalfeld S, Schmid B and others. 2012. Fiji: an open-source platform for biological-image analysis. *Nat Methods* 9(7):676-82.
- Schnoor M, Stradal TE, Rottner K. 2018. Cortactin: Cell Functions of A Multifaceted Actin-Binding Protein. *Trends Cell Biol* 28(2):79-98.
- Schwarz N, Leube RE. 2016. Intermediate Filaments as Organizers of Cellular Space: How They Affect Mitochondrial Structure and Function. *Cells* 5(3).
- Schwarz TL. 2013. Mitochondrial trafficking in neurons. *Cold Spring Harb Perspect Biol* 5(6).
- Sebe-Pedros A, Grau-Bove X, Richards TA, Ruiz-Trillo I. 2014. Evolution and classification of myosins, a paneukaryotic whole-genome approach. *Genome Biol Evol* 6(2):290-305.
- Shankar J, Messenberg A, Chan J, Underhill TM, Foster LJ, Nabi IR. 2010. Pseudopodial actin dynamics control epithelial-mesenchymal transition in metastatic cancer cells. *Cancer Res* 70(9):3780-90.
- Shneyer BI, Usaj M, Henn A. 2016. Myo19 is an outer mitochondrial membrane motor and effector of starvation-induced filopodia. *J Cell Sci* 129(3):543-56.
- Shneyer BI, Usaj M, Wiesel-Motiuk N, Regev R, Henn A. 2017. ROS induced distribution of mitochondria to filopodia by Myo19 depends on a class specific tryptophan in the motor domain. *Sci Rep* 7(1):11577.

- Sievers F, Wilm A, Dineen D, Gibson TJ, Karplus K, Li W, Lopez R, McWilliam H, Remmert M, Soding J and others. 2011. Fast, scalable generation of high-quality protein multiple sequence alignments using Clustal Omega. *Mol Syst Biol* 7:539.
- Singh PP, Hawthorne JL, Quintero OA. 2016. Permeabilization Activated Reduction in Fluorescence (PARF): a novel method to measure kinetics of protein interactions with intracellular structures. *Cytoskeleton* 73(6):271-85.
- Stark C, Breitkreutz BJ, Reguly T, Boucher L, Breitkreutz A, Tyers M. 2006. BioGRID: a general repository for interaction datasets. *Nucleic Acids Res* 34(Database issue):D535-9.
- Stowers RS, Megeath LJ, Gorska-Andrzejak J, Meinertzhagen IA, Schwarz TL. 2002. Axonal transport of mitochondria to synapses depends on milton, a novel Drosophila protein. *Neuron* 36(6):1063-77.
- Sun HM, Chen XL, Chen XJ, Liu J, Ma L, Wu HY, Huang QH, Xi XD, Yin T, Zhu J and others. 2017. PALLD Regulates Phagocytosis by Enabling Timely Actin Polymerization and Depolymerization. *J Immunol* 199(5):1817-1826.
- Tsai PI, Papakyrikos AM, Hsieh CH, Wang X. 2017. Drosophila MIC60/mitofilin conducts dual roles in mitochondrial motility and crista structure. *Mol Biol Cell* 28(24):3471-3479.
- van Spronsen M, Mikhaylova M, Lipka J, Schlager MA, van den Heuvel DJ, Kuijpers M, Wulf PS, Keijzer N, Demmers J, Kapitein LC and others. 2013. TRAK/Milton motor-adaptor proteins steer mitochondrial trafficking to axons and dendrites. *Neuron* 77(3):485-502.
- Vetter IR, Wittinghofer A. 2001. The guanine nucleotide-binding switch in three dimensions. *Science* 294(5545):1299-304.
- Vijayraghavan S, Kantor B. 2017. A Protocol for the Production of Integrase-deficient Lentiviral Vectors for CRISPR/Cas9-mediated Gene Knockout in Dividing Cells. *J Vis Exp*(130).
- von Boxberg Y, Soares S, Fereol S, Fodil R, Bartolami S, Taxi J, Tricaud N, Nothias F. 2014. Giant scaffolding protein AHNAK1 interacts with beta-dystroglycan and controls motility and mechanical properties of Schwann cells. *Glia* 62(9):1392-406.
- Walch L, Pellier E, Leng W, Lakisic G, Gautreau A, Contremoulins V, Verbavatz JM, Jackson CL. 2018. GBF1 and Arf1 interact with Miro and regulate mitochondrial positioning within cells. *Sci Rep* 8(1):17121.
- Wang X, Schwarz TL. 2009. The mechanism of Ca<sup>2+</sup> -dependent regulation of kinesin-mediated mitochondrial motility. *Cell* 136(1):163-74.
- Zerbes RM, van der Klei IJ, Veenhuis M, Pfanner N, van der Laan M, Bohnert M. 2012. Mitofilin complexes: conserved organizers of mitochondrial membrane architecture. *Biol Chem* 393(11):1247-61.

**A**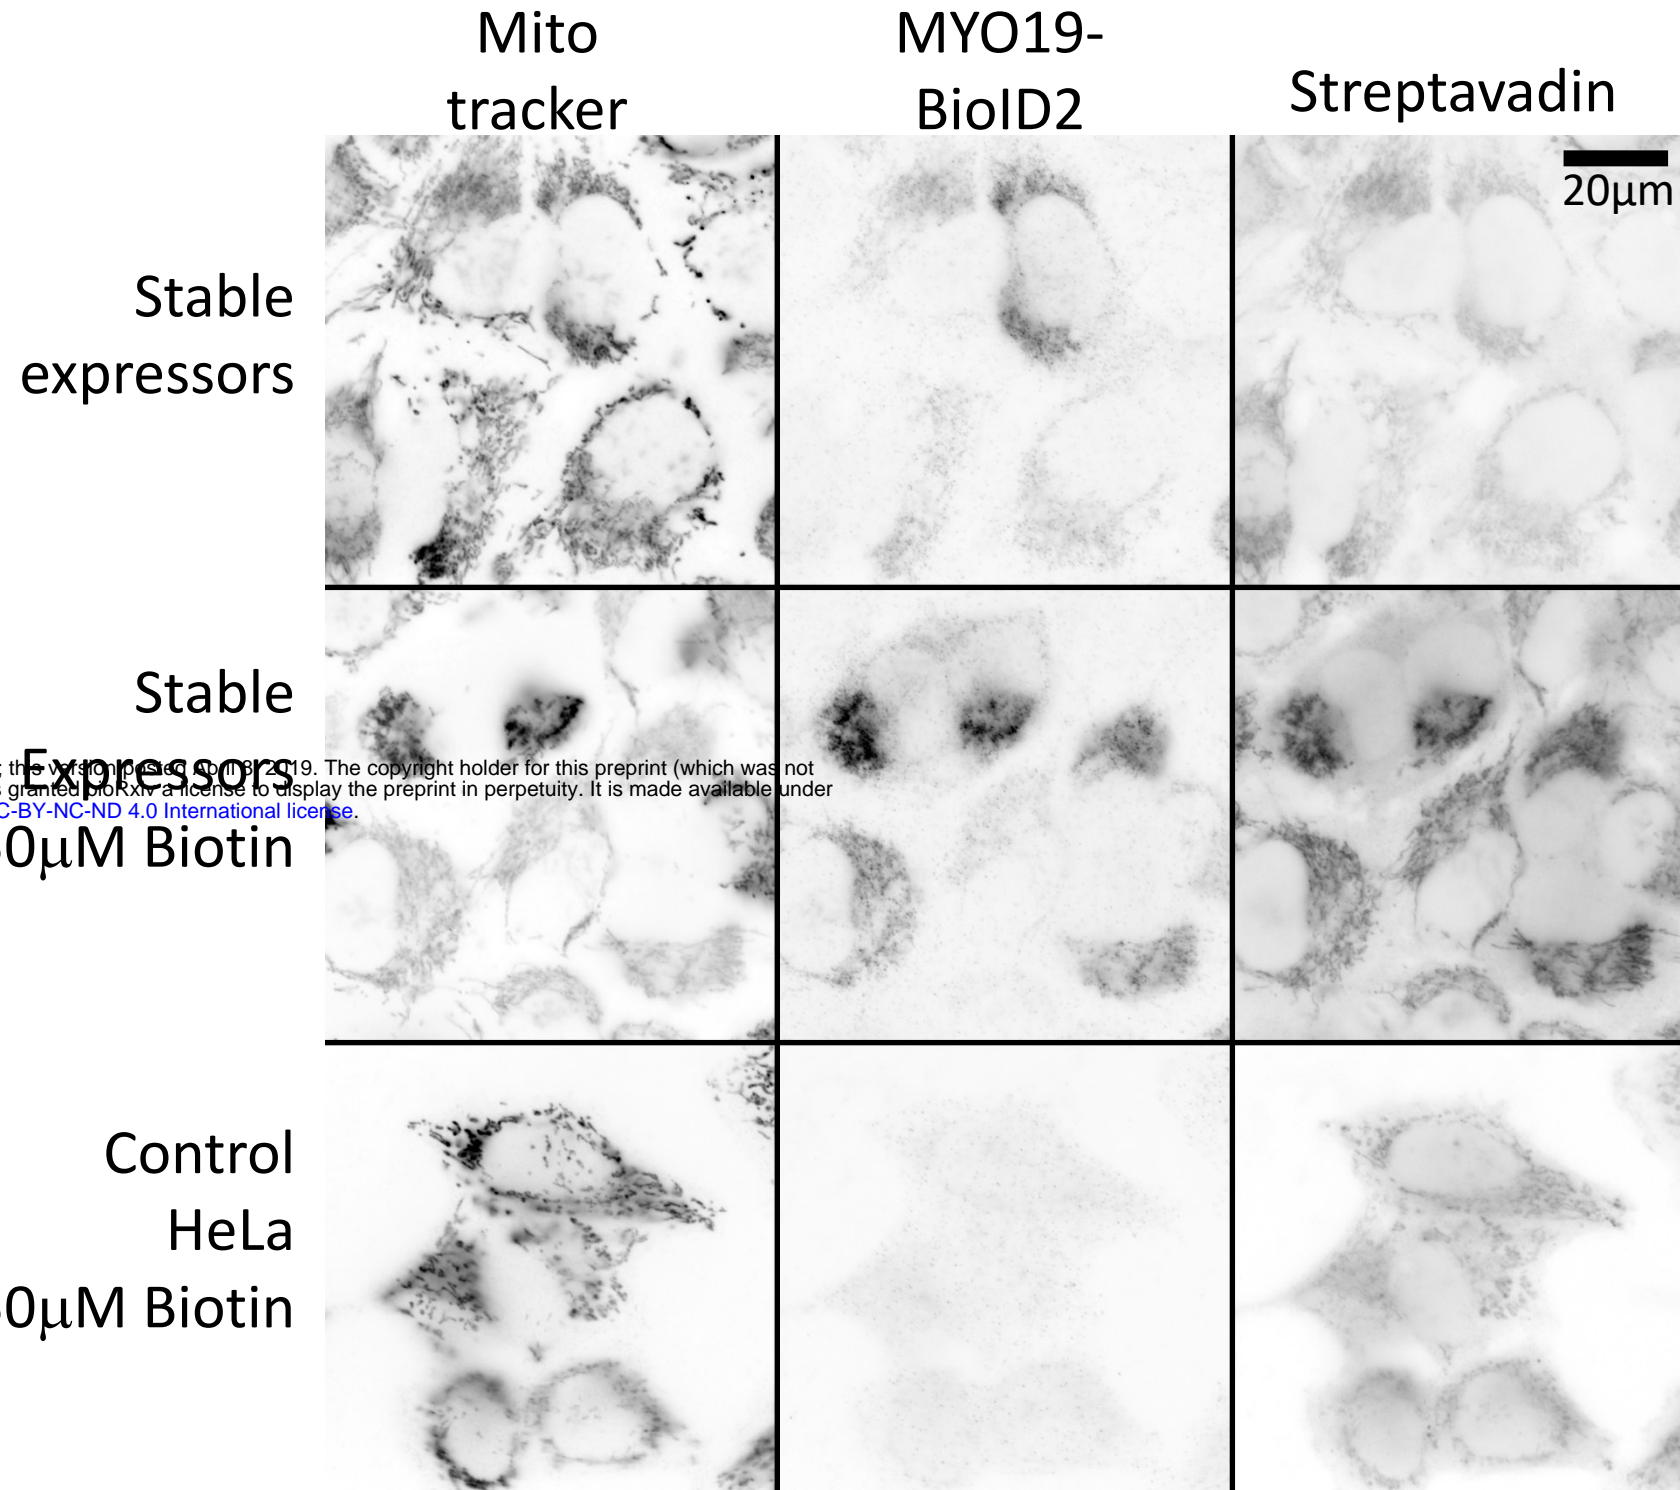

bioRxiv preprint doi: <https://doi.org/10.1101/602938>; this version posted April 2, 2019. The copyright holder for this preprint (which was not certified by peer review) is the author/funder, who has granted bioRxiv a license to display the preprint in perpetuity. It is made available under aCC-BY-NC-ND 4.0 International license.

**B**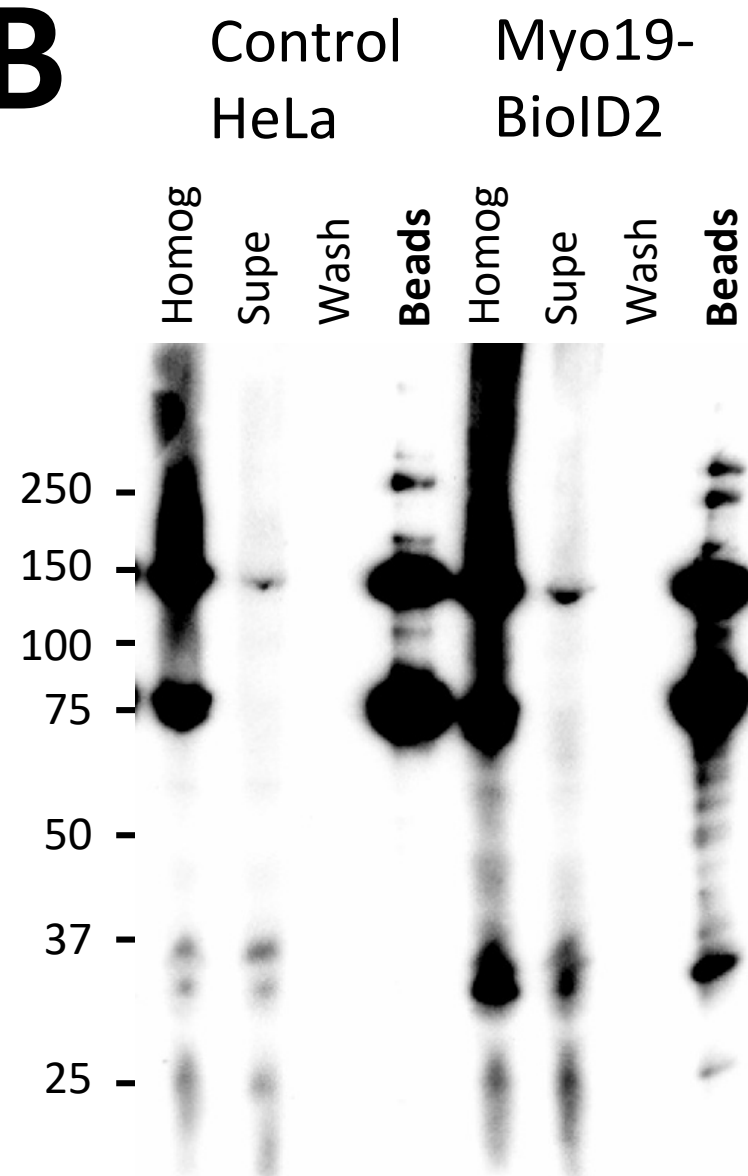**C**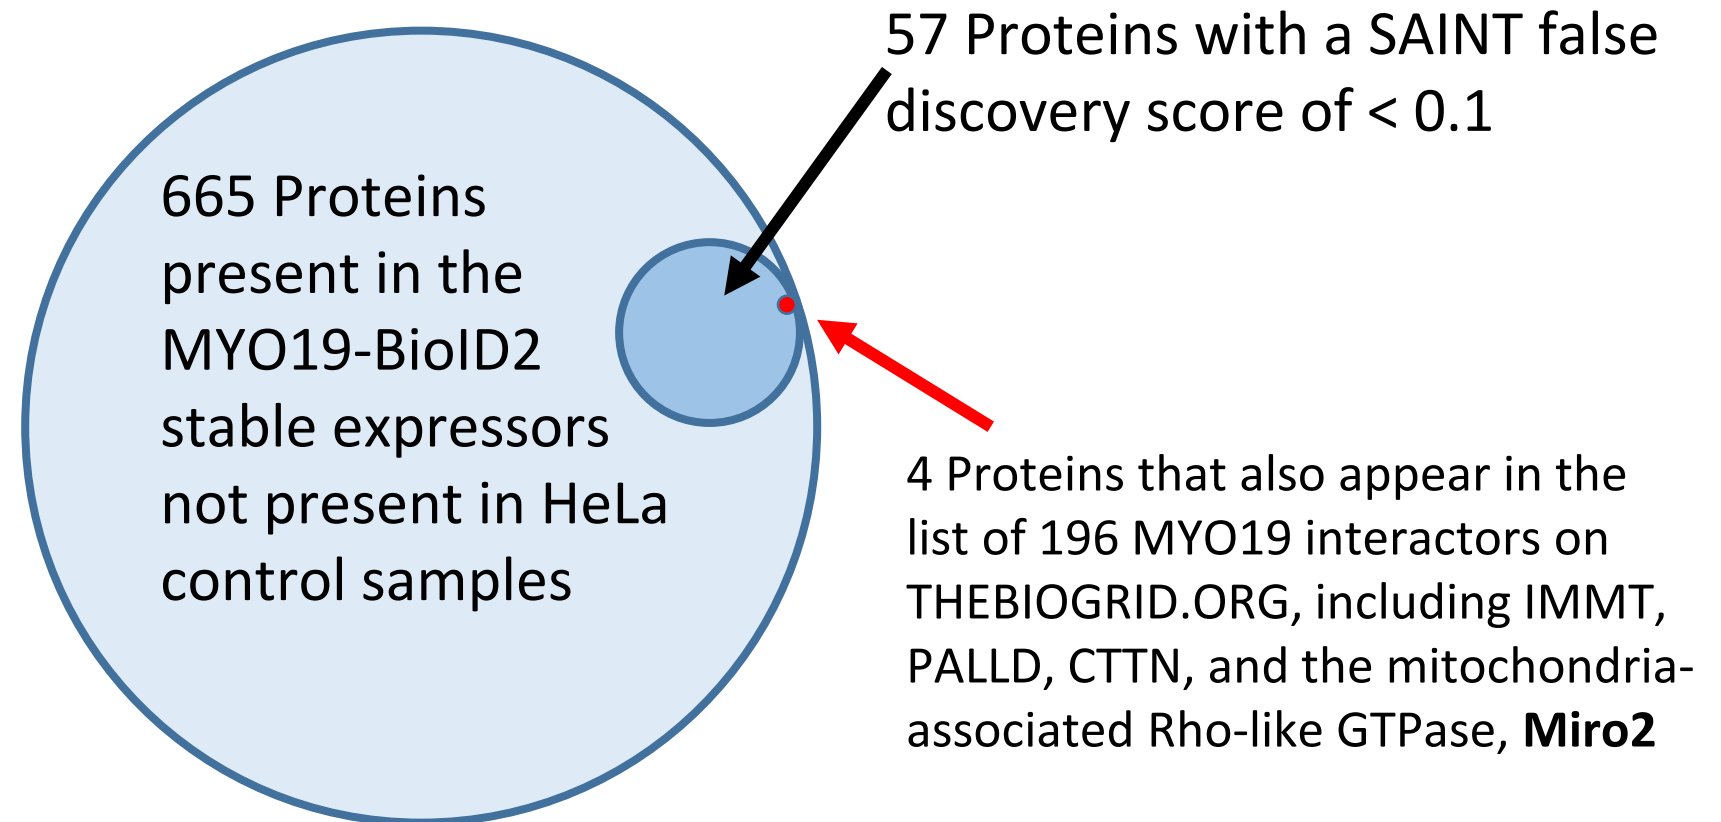**Figure 1**

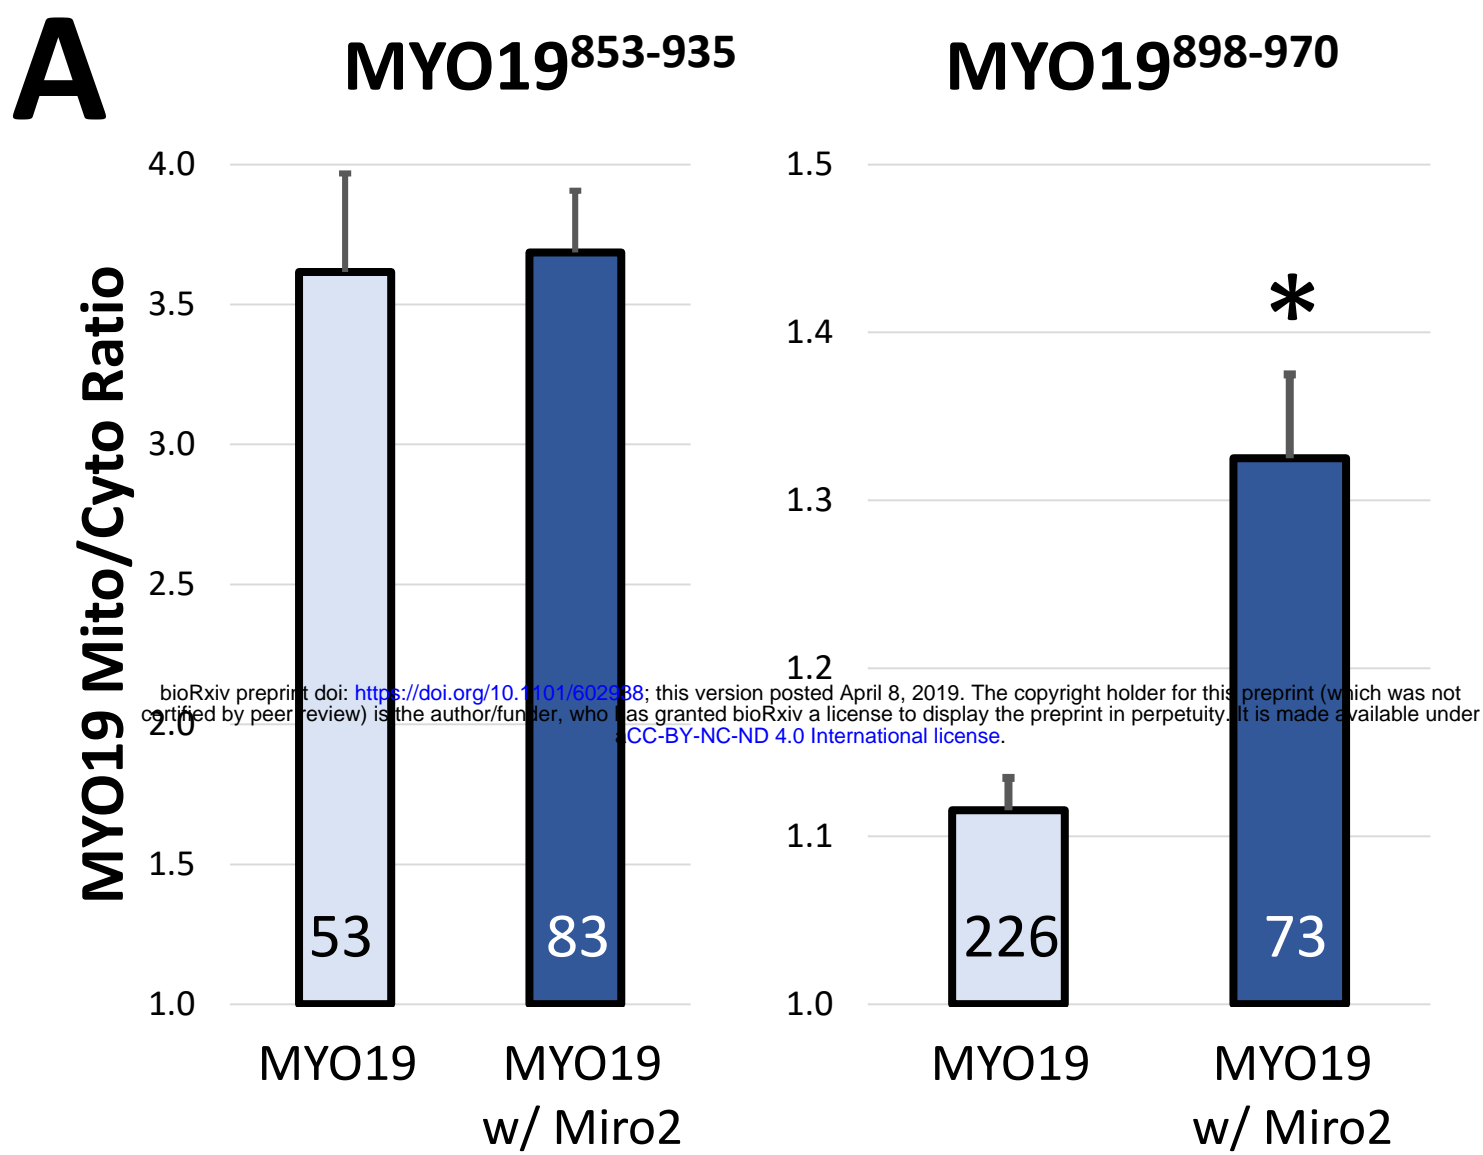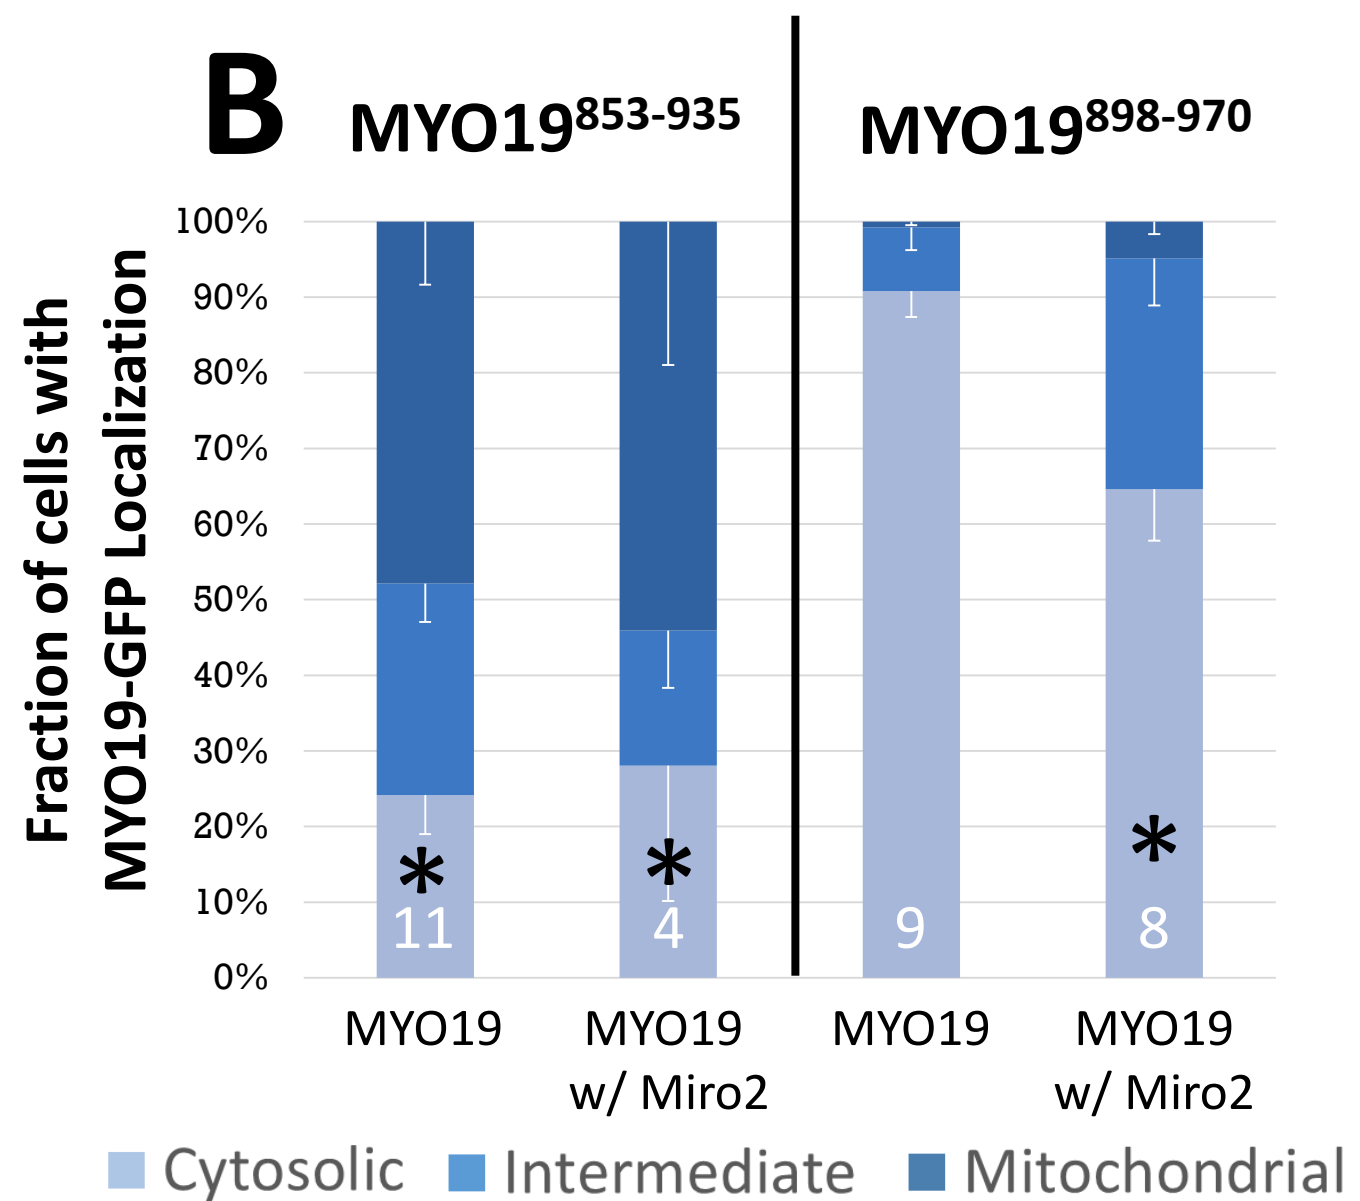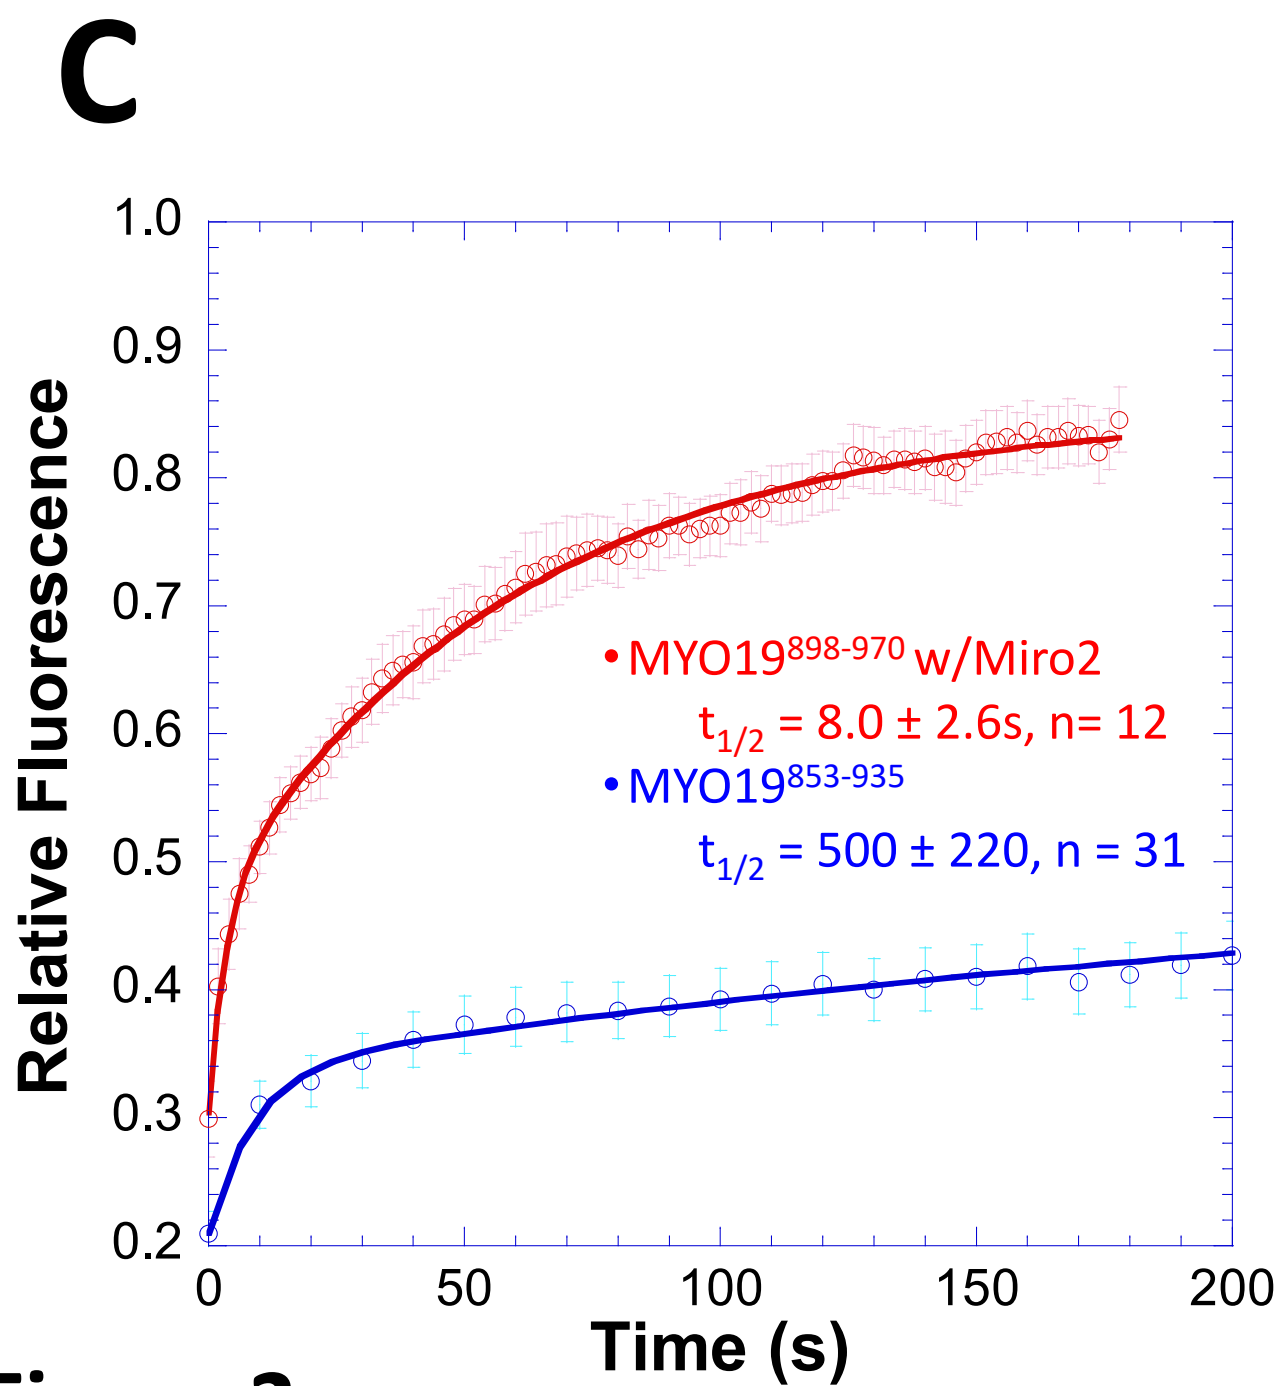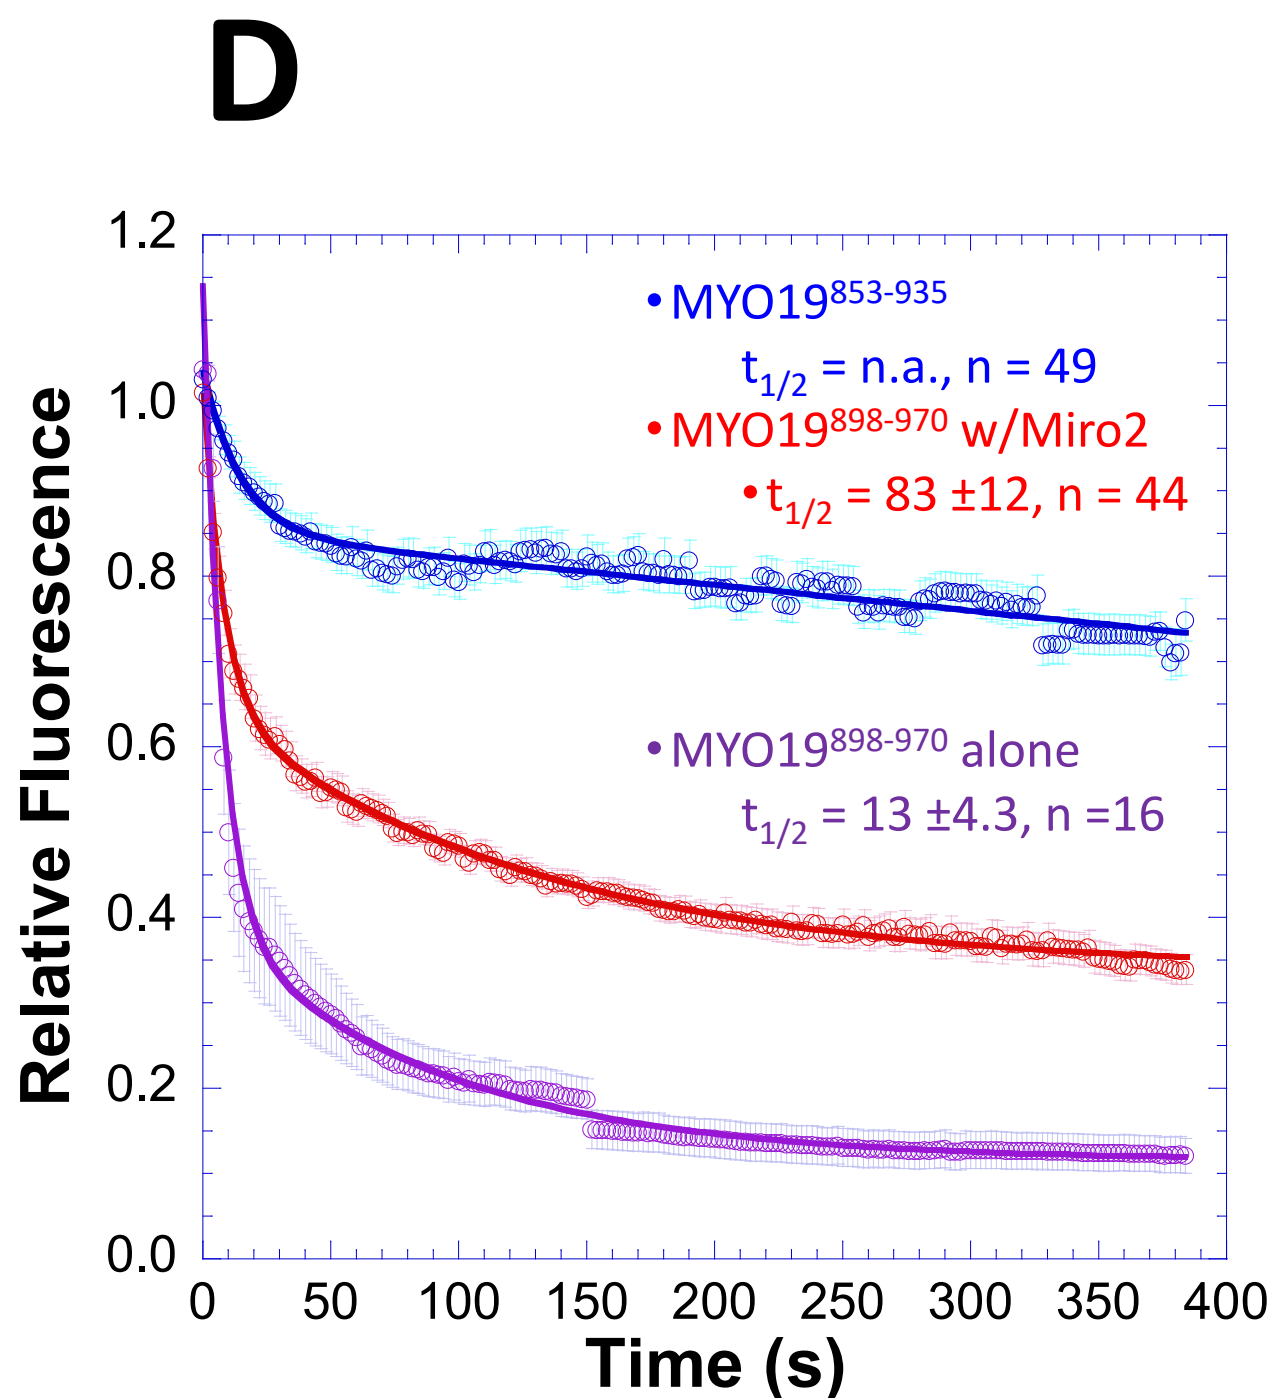

**Figure 2**

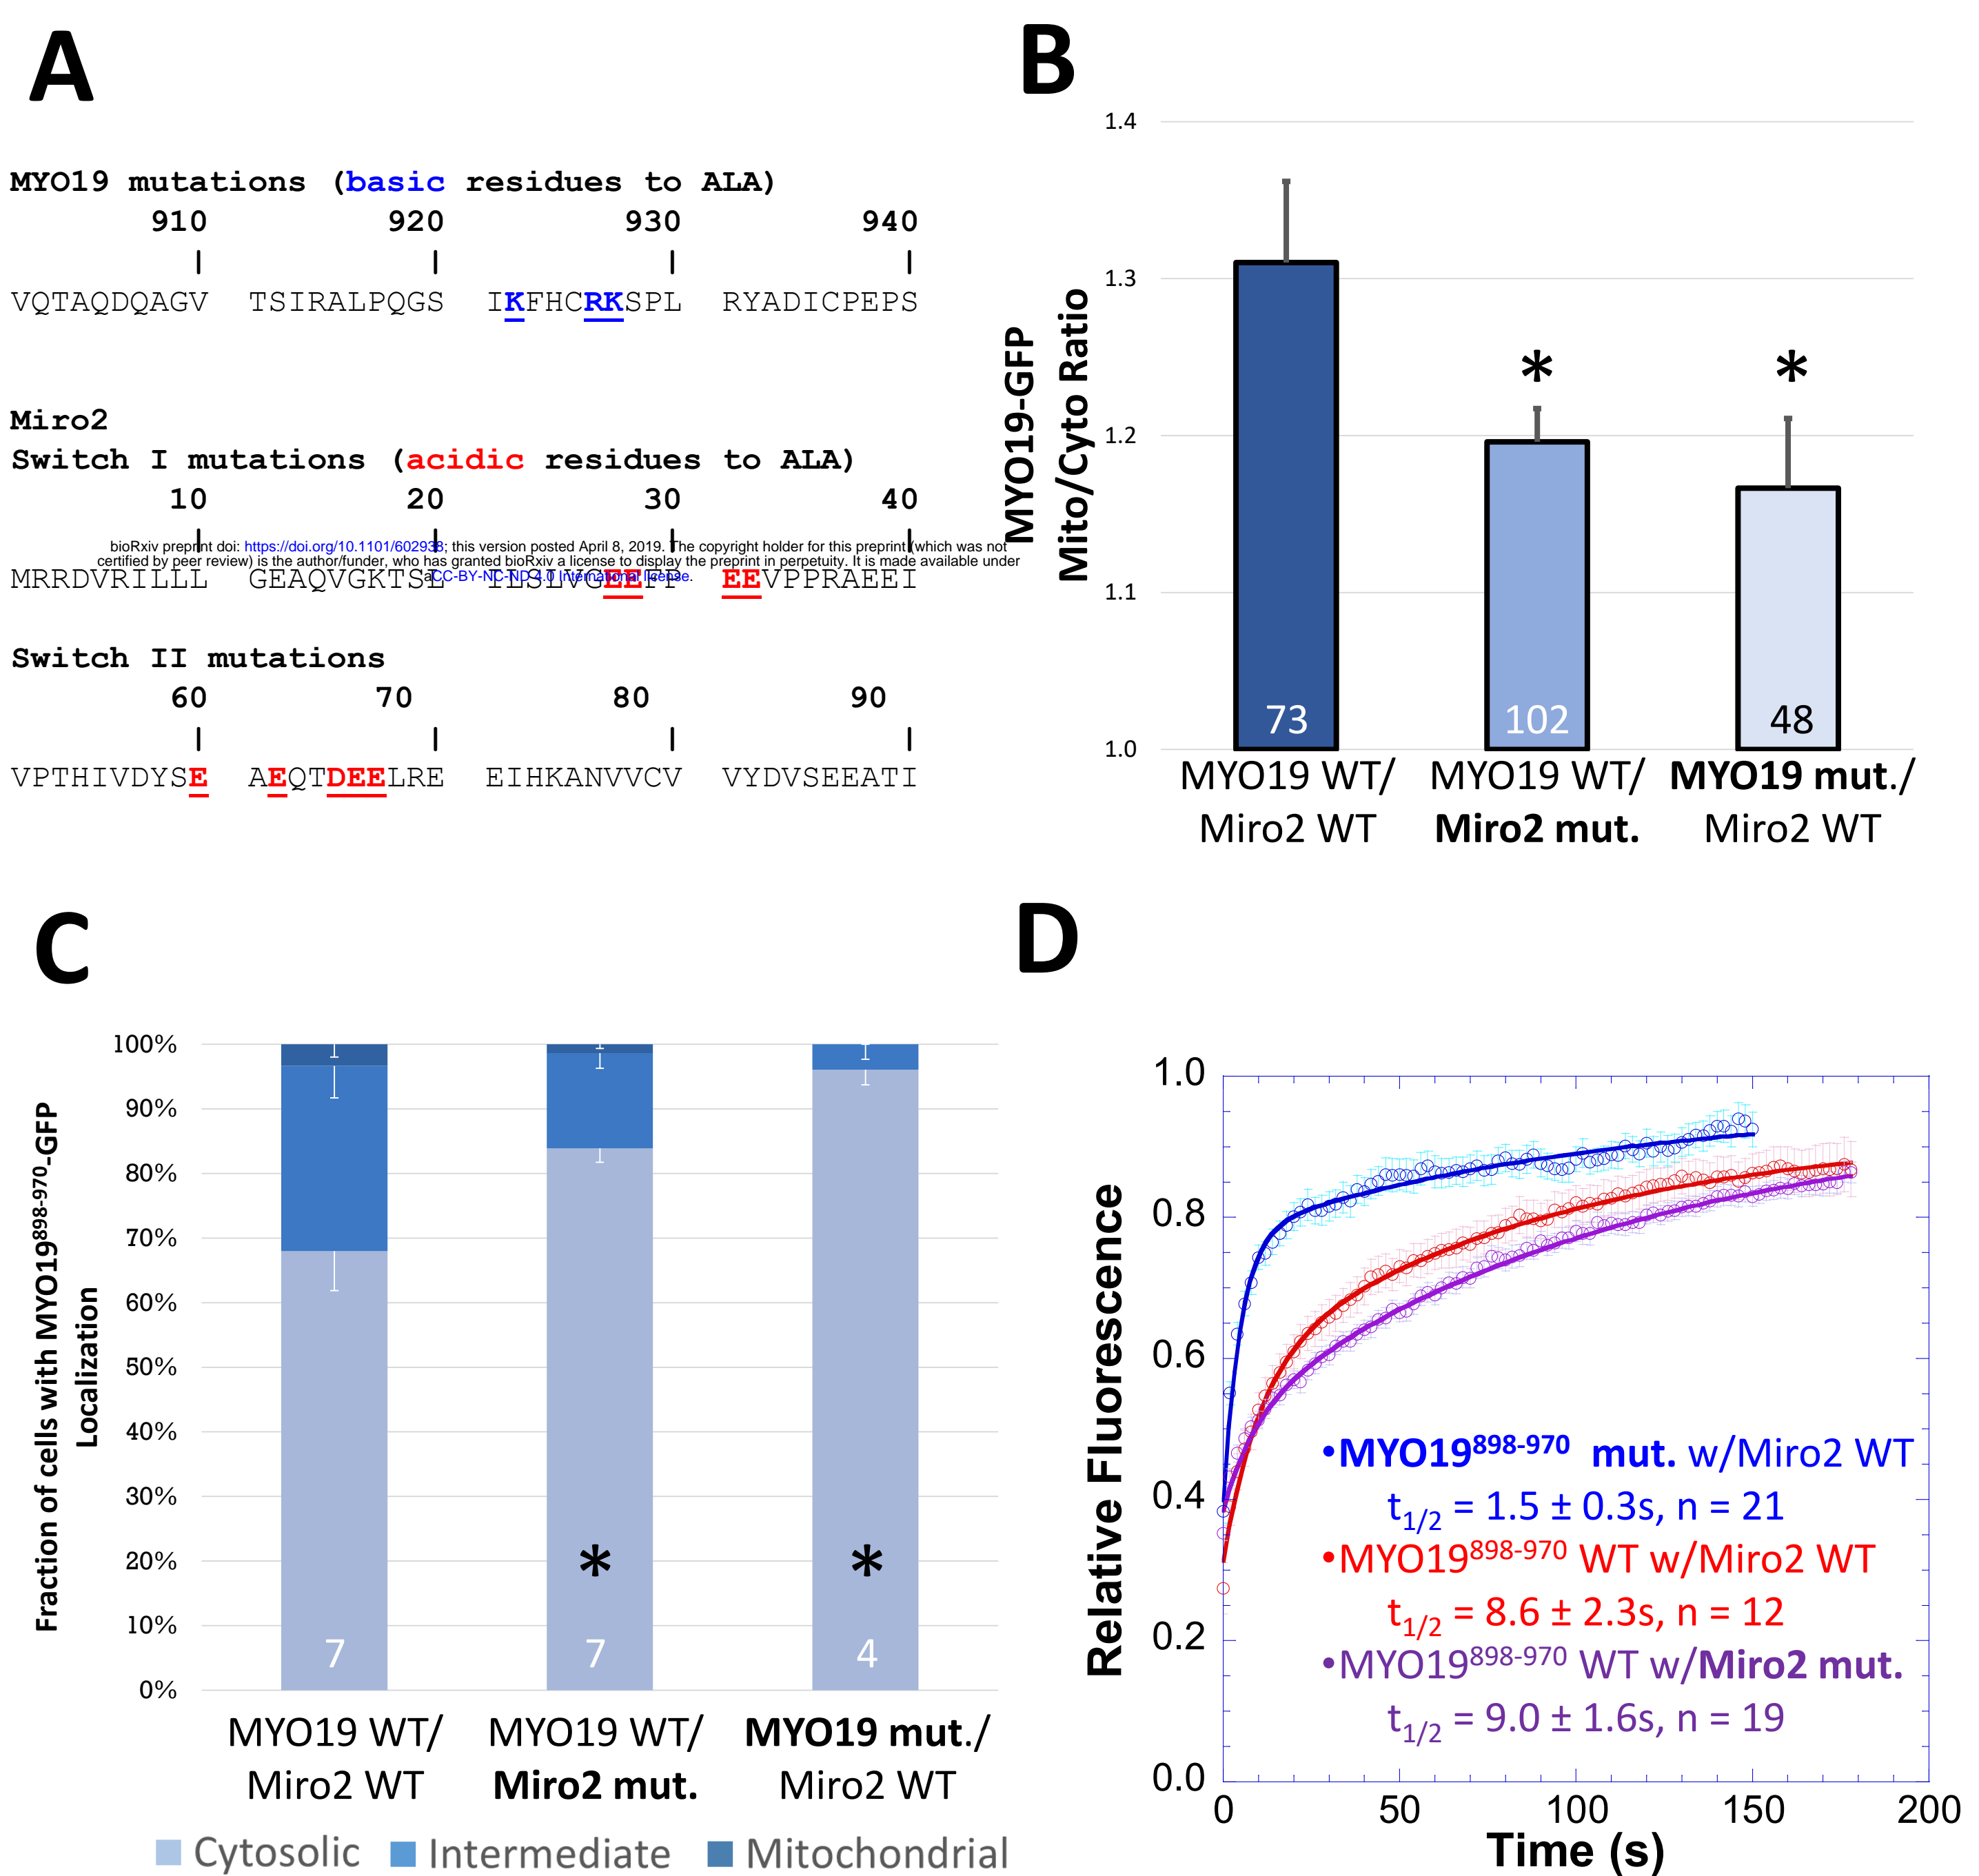

**Figure 3**

**A****Miro2 Domain Map**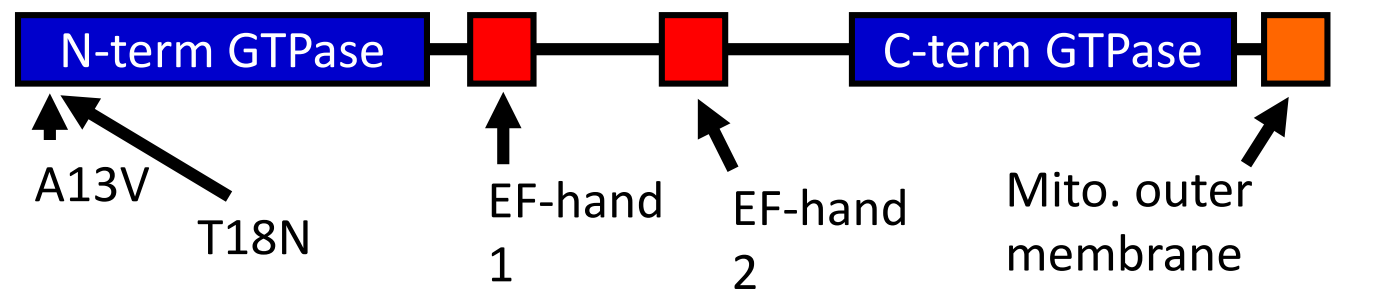

bioRxiv preprint doi: <https://doi.org/10.1101/602938>; this version posted April 8, 2019. The copyright holder for this preprint (which was not certified by peer review) is the author/funder, who has granted bioRxiv a license to display the preprint in perpetuity. It is made available under aCC-BY-NC-ND 4.0 International license.

**B**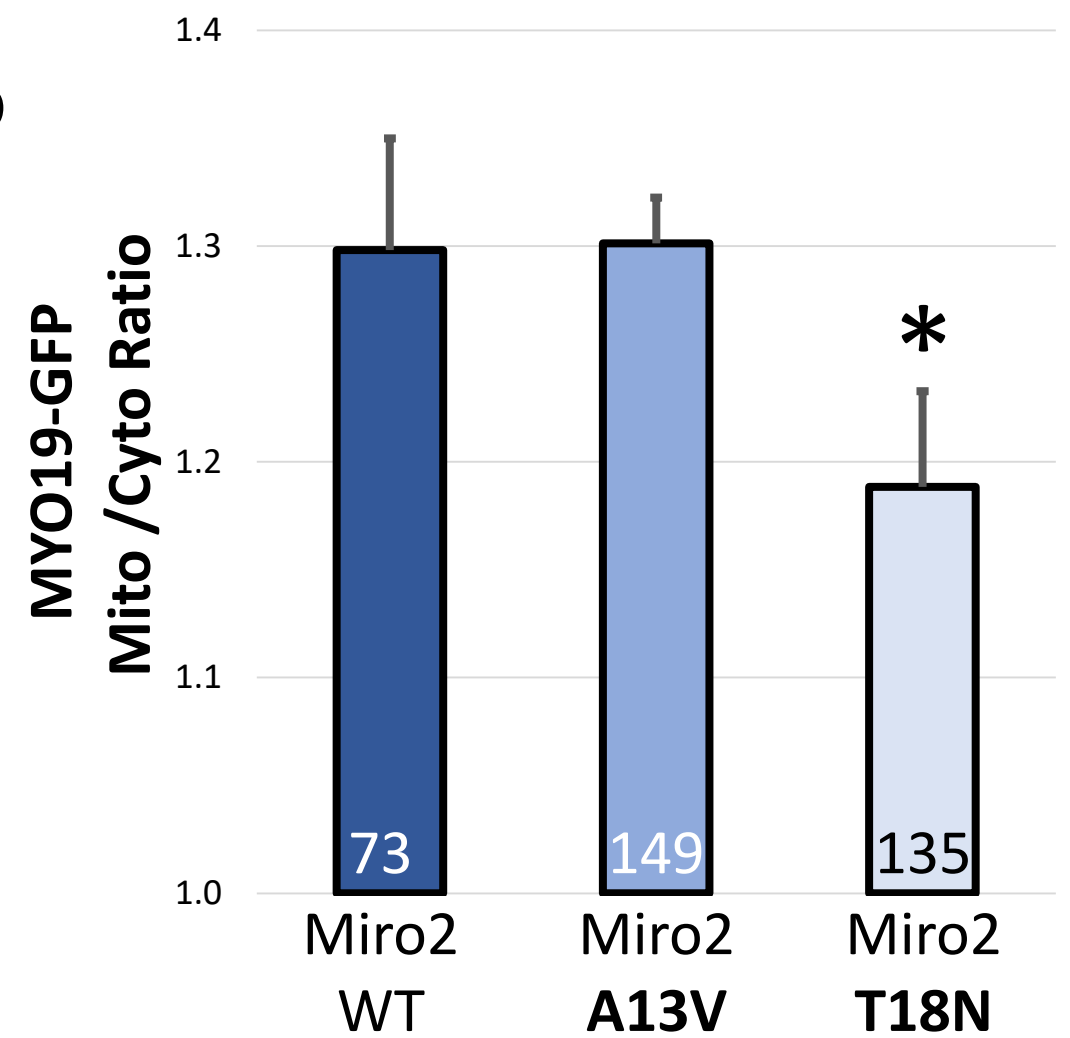**C**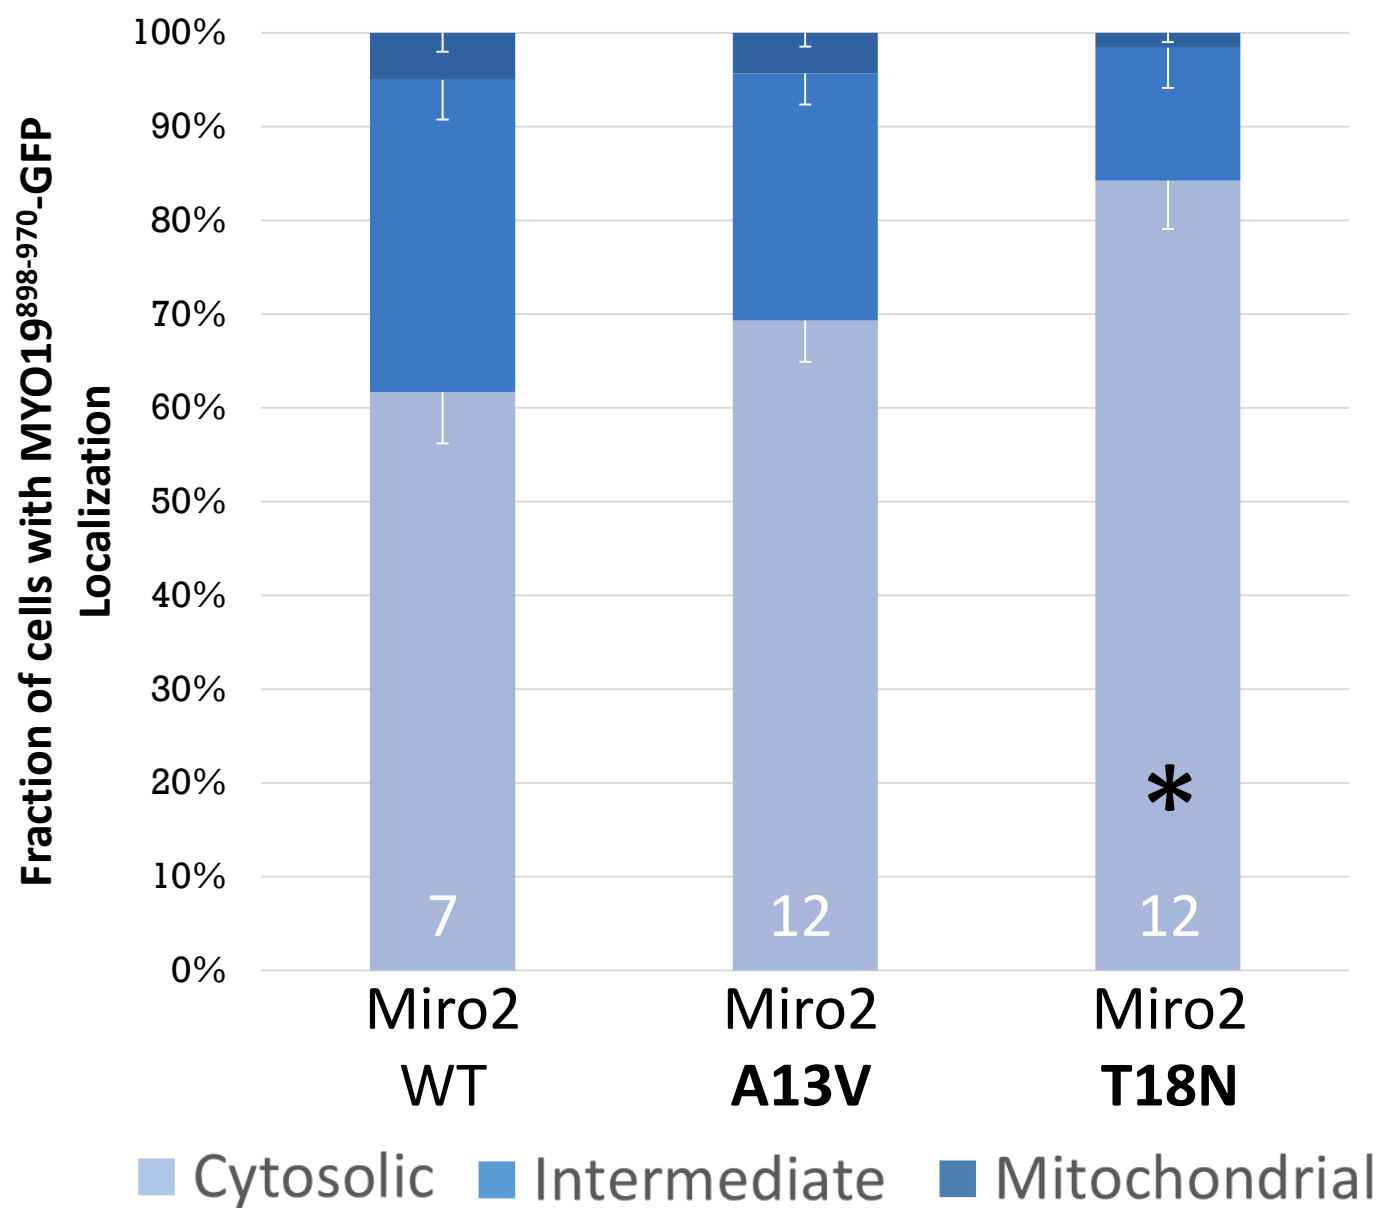**D**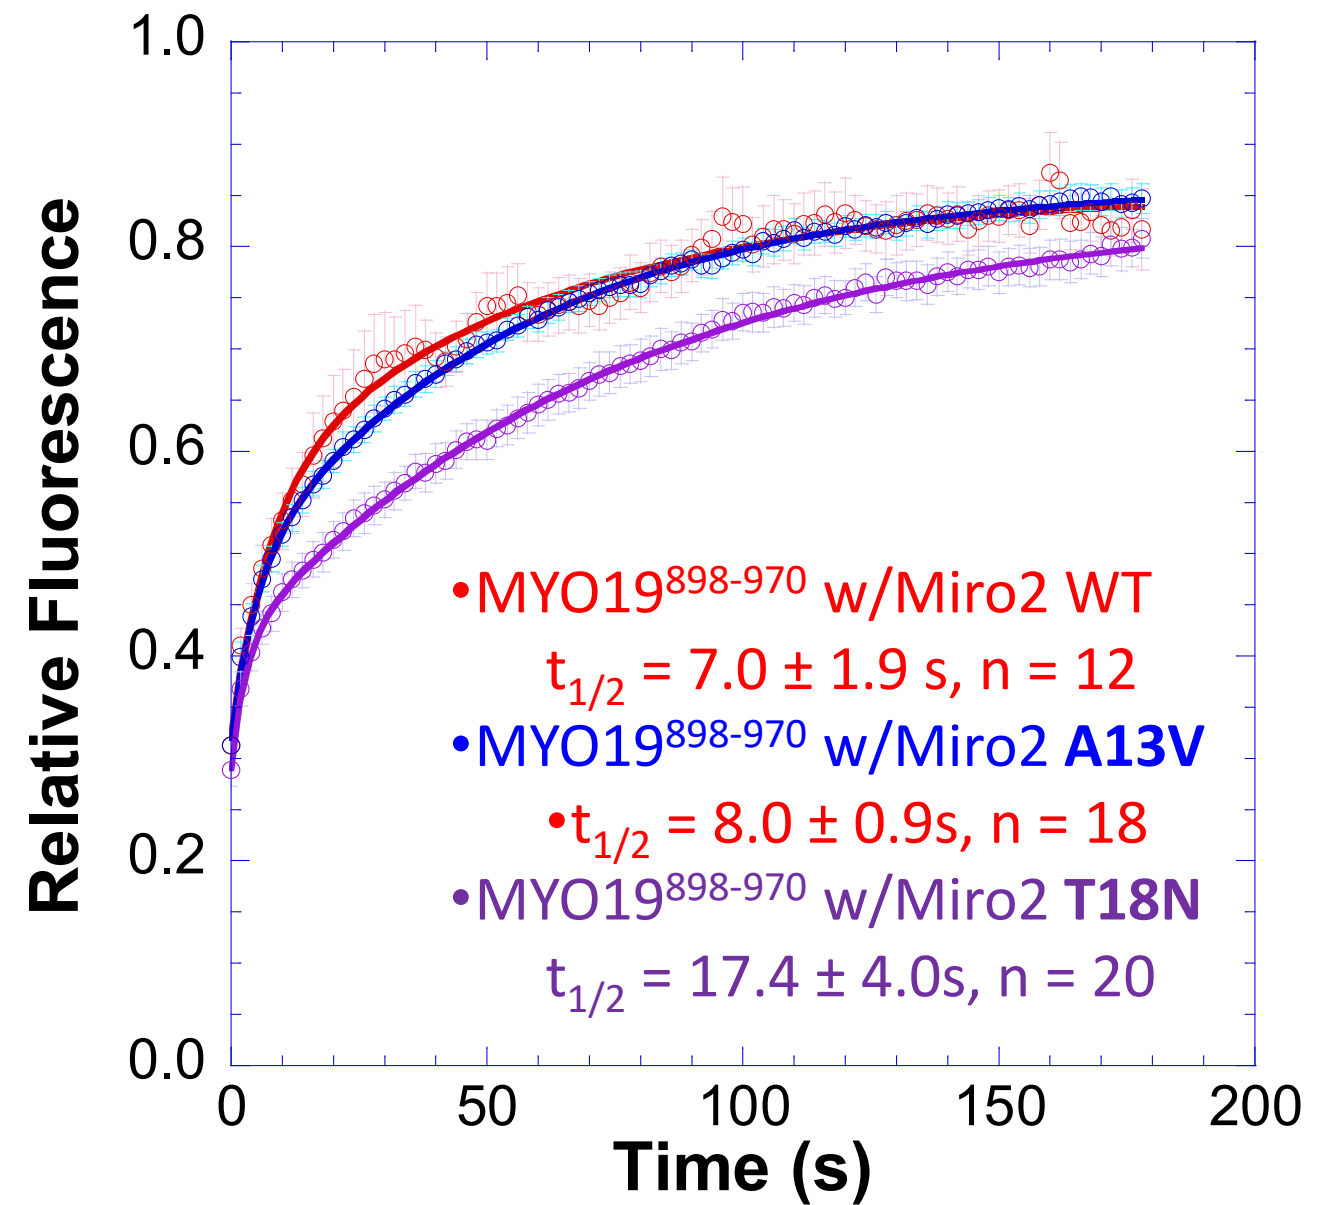**Figure 4**

**A**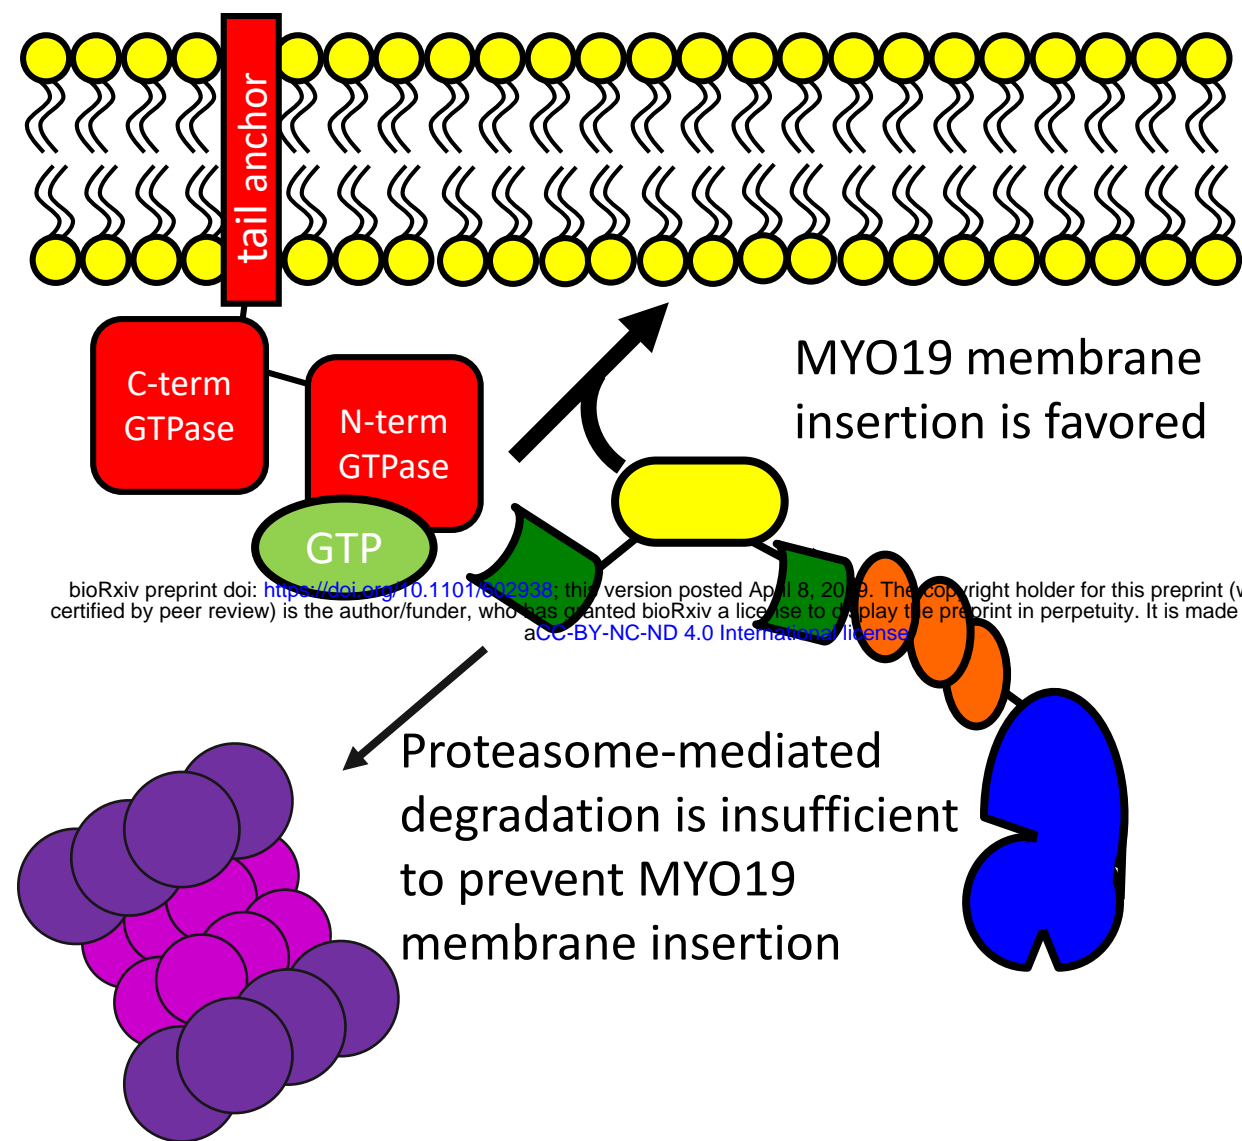**B**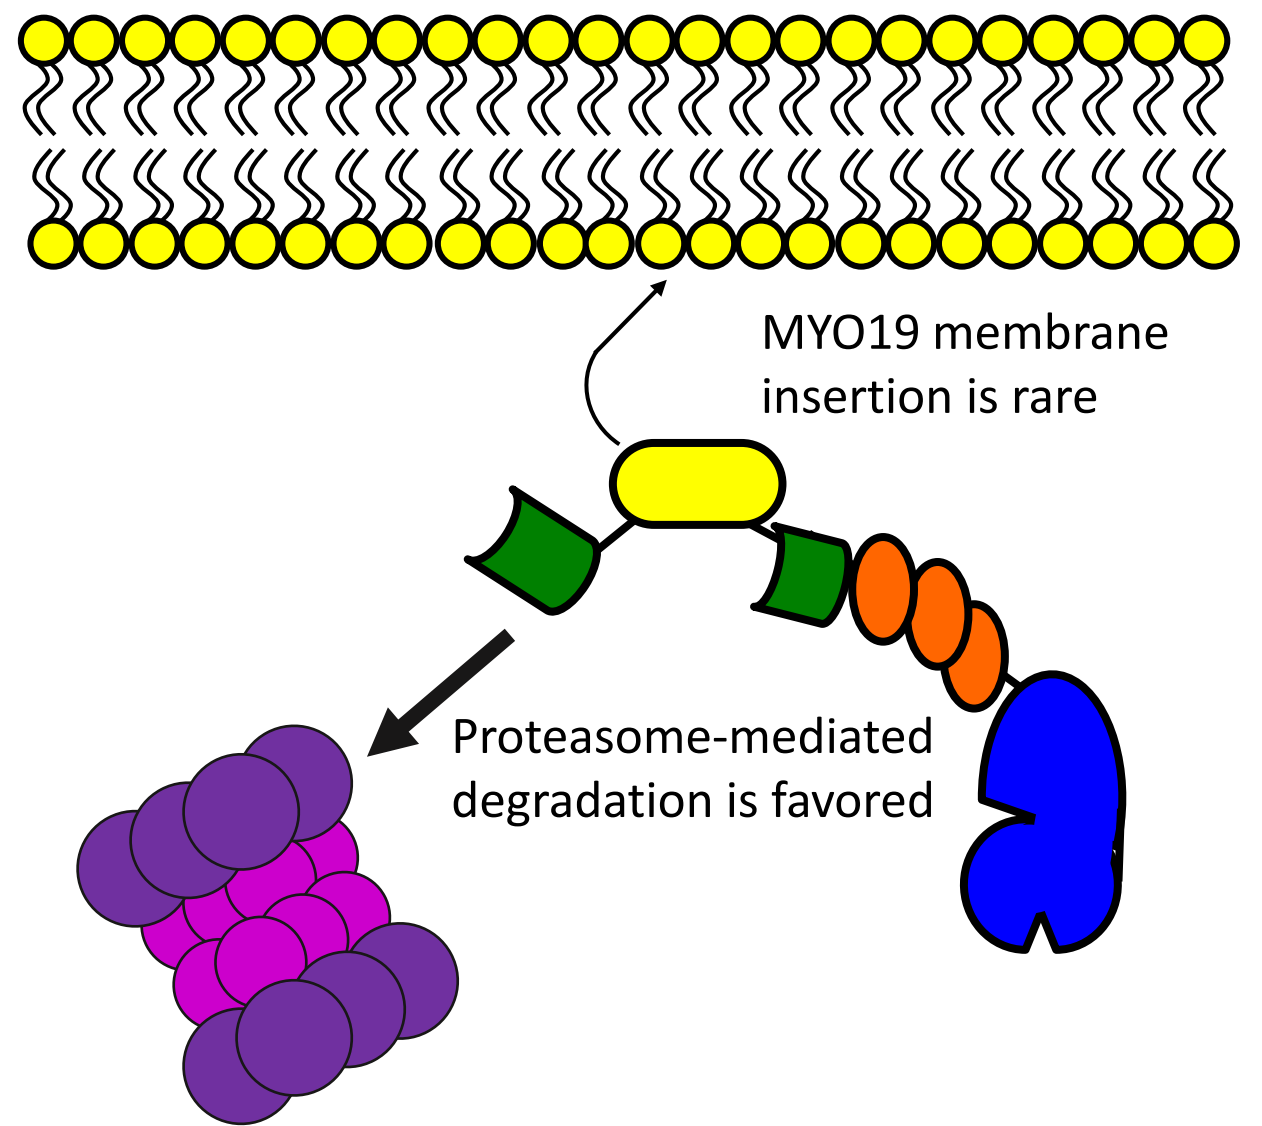**C**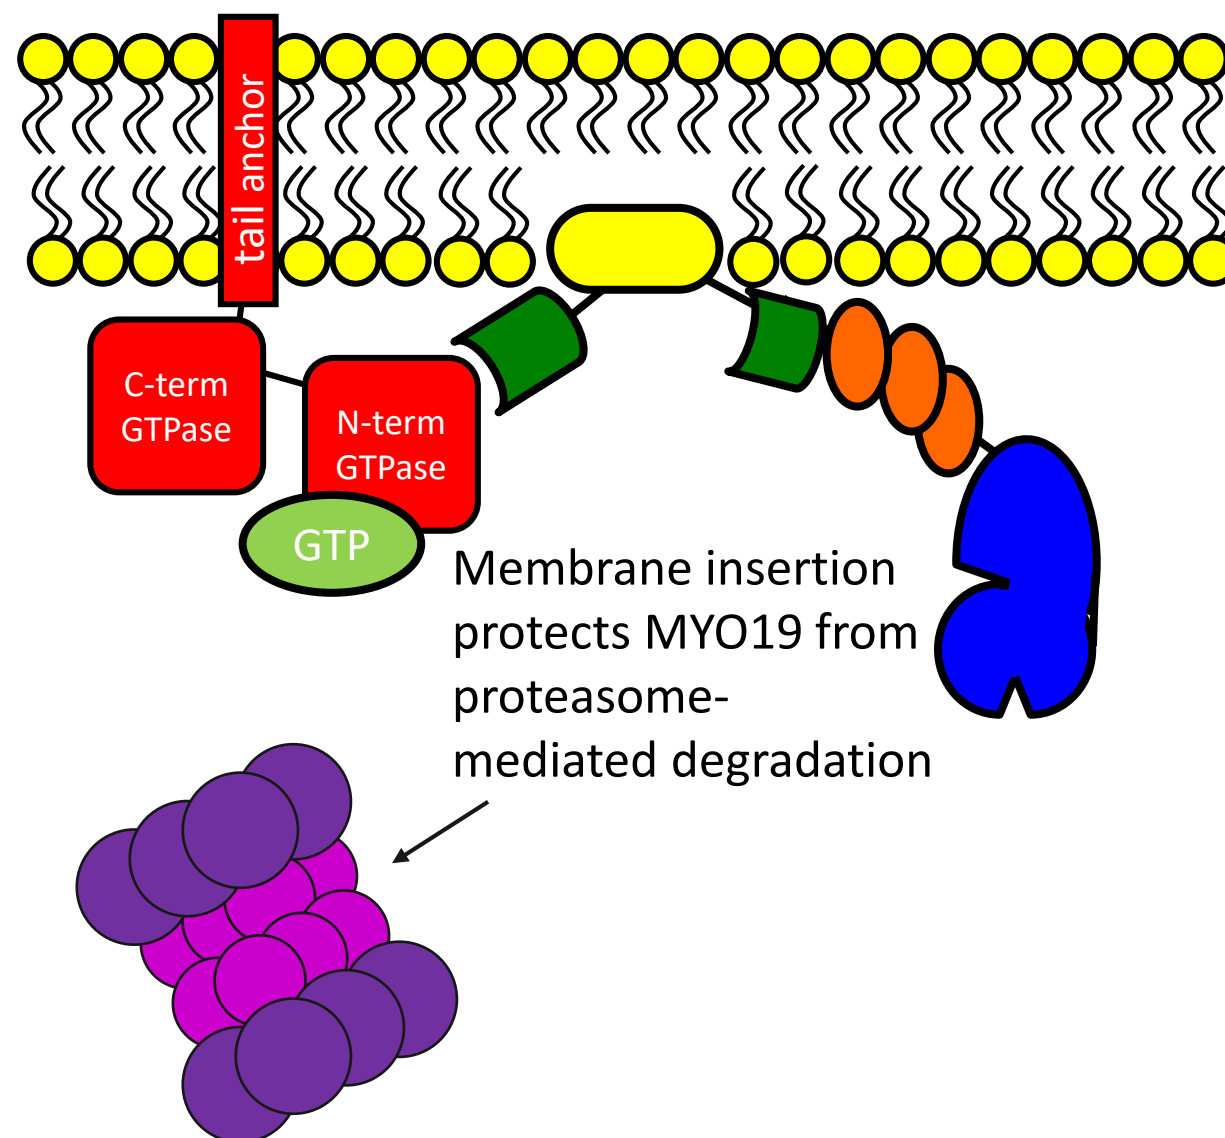**Not to scale****Figure 5**
